# Supplementary material for: Chemoselective catalytic reduction of conjugated α,β-unsaturated ketones to saturated ketones via a hydroboration/protodeboronation strategy
Source: Royal Society of Chemistry journal article supplement (doi:10.1039/c5qo00289c), 2015-10-26

## Supporting Information

*for*

### **Chemoselective Catalytic Reduction of Conjugate $\alpha,\beta$ - Unsaturated Ketones to Saturated Ketones via Hydroboration /Protodeboration strategy**

Wen Ding<sup>a</sup>, Qiuling Song<sup>a,\*</sup>

<sup>a</sup>Institute of Next Generation Matter Transformation, College of Chemical Engineering at  
Huaqiao Univeristy

<sup>b</sup>Beijing National Laboratory for Molecular Sciences, Beijing, 100190, P. R. China

fax:86-592-6162990; email: qsong@hqu.edu.cn

#### **Table of Contents**

|                                                                     |           |
|---------------------------------------------------------------------|-----------|
| <b>General information.....</b>                                     | <b>2</b>  |
| <b>Optimization of the reaction conditions.....</b>                 | <b>2</b>  |
| <b>Prepative scale.....</b>                                         | <b>3</b>  |
| <b>Labeling Experiments .....</b>                                   | <b>3</b>  |
| <b>General procedure and Characterization data for product.....</b> | <b>4</b>  |
| <b>References.....</b>                                              | <b>13</b> |
| <b>NMR Spectra.....</b>                                             | <b>15</b> |

## General information

All experiments were conducted with a sealed pressure vessel. Flash column chromatography was performed over silica gel (200-300 mesh).  $^1\text{H}$  NMR spectra were recorded on a Bruker AVIII-500M spectrometers, Chemical shifts (in ppm) were referenced to  $\text{CDCl}_3$  ( $\delta = 7.26$  ppm) as an internal standard.  $^{13}\text{C}$  NMR spectra were obtained by using the same NMR spectrometers and were calibrated with  $\text{CDCl}_3$  ( $\delta = 77.0$  ppm). Unless otherwise noted, materials obtained from commercial suppliers were used without further purification.

## Optimization of the reaction conditions

Optimization of the reaction conditions.<sup>a</sup>

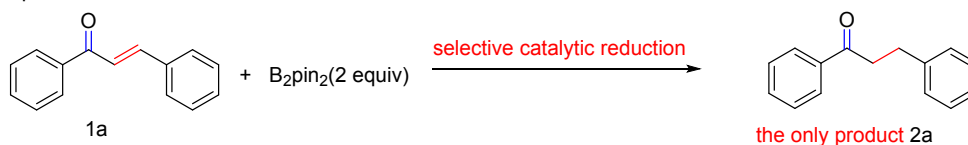

| Entry | Catalyst (10 mol %)       | base (1.5 equiv)         | $\text{B}_2\text{pin}_2$ (2 equiv) | temp ( $^{\circ}\text{C}$ ) | solvent (mL)             | Time(22 h) | atm          | yield <sup>b</sup> |
|-------|---------------------------|--------------------------|------------------------------------|-----------------------------|--------------------------|------------|--------------|--------------------|
| 1     | CuBr                      | $\text{Cs}_2\text{CO}_3$ |                                    | 90                          | Toulene (4)<br>THF (1)   |            | $\text{O}_2$ | 65 %               |
| 2     | CuBr                      | $\text{Cs}_2\text{CO}_3$ |                                    | 90                          | Toulene (4)<br>THF (1)   |            | air          | 86 % <sup>c</sup>  |
| 3     | CuBr                      | $\text{Cs}_2\text{CO}_3$ |                                    | 90                          | Toulene (4)<br>THF (1)   |            | $\text{N}_2$ | 88 %               |
| 4     | $\text{CuBr}_2$           | $\text{Cs}_2\text{CO}_3$ |                                    | 90                          | Toulene (4)<br>THF (1)   |            | air          | 71 %               |
| 5     | CuI                       | $\text{Cs}_2\text{CO}_3$ |                                    | 90                          | Toulene (4)<br>THF (1)   |            | air          | 85 %               |
| 6     | CuCl                      | $\text{Cs}_2\text{CO}_3$ |                                    | 90                          | Toulene (4)<br>THF (1)   |            | air          | 75 %               |
| 7     | $\text{Cu}(\text{OAc})_2$ | $\text{Cs}_2\text{CO}_3$ |                                    | 90                          | Toulene (4)<br>THF (1)   |            | air          | 79 %               |
| 8     | CuO                       | $\text{Cs}_2\text{CO}_3$ |                                    | 90                          | Toulene (4)<br>THF (1)   |            | air          | trace              |
| 9     | $\text{Cu}(\text{OTf})_2$ | $\text{Cs}_2\text{CO}_3$ |                                    | 90                          | Toulene (4)<br>THF (1)   |            | air          | 83 %               |
| 10    | $\text{CuCl}_2$           | $\text{Cs}_2\text{CO}_3$ |                                    | 90                          | Toulene (4)<br>THF (1)   |            | air          | 68 %               |
| 11    | CuBr                      | $\text{Cs}_2\text{CO}_3$ |                                    | 90                          | Toulene (5)              |            | air          | 38 %               |
| 12    | CuBr                      | $\text{Cs}_2\text{CO}_3$ |                                    | 90                          | THF (5)                  |            | air          | trace              |
| 13    | CuBr                      | $\text{Cs}_2\text{CO}_3$ |                                    | 90                          | DMF(5)                   |            | air          | 0 %                |
| 14    | CuBr                      | $\text{Cs}_2\text{CO}_3$ |                                    | 90                          | Dioxane(5)               |            | air          | 41 %               |
| 15    | CuBr                      | $\text{Cs}_2\text{CO}_3$ |                                    | 90                          | $\text{H}_2\text{O}$ (5) |            | air          | 24 %               |
| 16    | $\text{PdCl}_2$           | $\text{Cs}_2\text{CO}_3$ |                                    | 90                          | Toulene (4)<br>THF (1)   |            | air          | 48 %               |
| 17    | $\text{FeCl}_2$           | $\text{Cs}_2\text{CO}_3$ |                                    | 90                          | Toulene (4)<br>THF (1)   |            | air          | trace              |
| 18    | CuBr                      | $\text{K}_2\text{CO}_3$  |                                    | 90                          | Toulene (4)<br>THF (1)   |            | air          | 78 %               |
| 19    | CuBr                      | KOAc                     |                                    | 90                          | Toulene (4)<br>THF (1)   |            | air          | 0 %                |
| 20    | CuBr                      | nBuOK                    |                                    | 90                          | Toulene (4)<br>THF (1)   |            | air          | 31 %               |
| 21    | CuBr                      | pyridine                 |                                    | 90                          | Toulene (4)<br>THF (1)   |            | air          | 0%                 |
| 22    | CuBr                      | $\text{Et}_3\text{N}$    |                                    | 90                          | Toulene (4)<br>THF (1)   |            | air          | 0 %                |

|    |      |                                 |    |                        |     |     |      |
|----|------|---------------------------------|----|------------------------|-----|-----|------|
| 23 | CuBr | Cs <sub>2</sub> CO <sub>3</sub> | 80 | Toulene (4)<br>THF (1) | 1 h | air | 73 % |
| 24 | CuBr | Cs <sub>2</sub> CO <sub>3</sub> | 70 | Toulene (4)<br>THF (1) | 1 h | air | 70 % |
| 25 | CuBr | Cs <sub>2</sub> CO <sub>3</sub> | 90 | Toulene (4)<br>THF (1) | 1 h | air | 88 % |
| 26 | -    | Cs <sub>2</sub> CO <sub>3</sub> | 90 | Toulene (4)<br>THF (1) | 1 h | air | 0 %  |
| 27 | CuBr | -                               | 90 | Toulene (4)<br>THF (1) | 1 h | air | 0 %  |
| 28 | CuBr | Cs <sub>2</sub> CO <sub>3</sub> | 90 | Toulene (4)<br>THF (1) | 1 h | air | 0 %  |

Reaction Conditions: a = chalcone (**1a**, 0.25 mmol), B<sub>2</sub>pin<sub>2</sub> (**2a**, 2 equiv), Cu salt (10 mol%), base (1.5 equiv), solvent (5 mL), 22 h, temp., corresponding atmosphere. b = GC yield. c = Isolated yield.

## Prepative scale

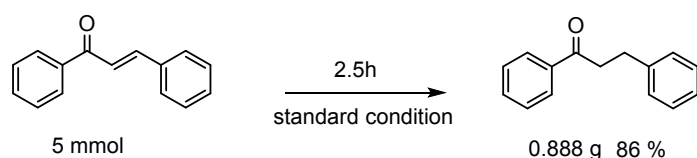

A sealed pressure vessel was charged with chalcone (**1a**) (1040 mg, 5 mmol), B<sub>2</sub>pin<sub>2</sub> (2560mg, 10 mmol), CuBr (72 mg, 0.5 mmol), Cs<sub>2</sub>CO<sub>3</sub> (2420 mg, 7.5mmol), and THF (20 mL), Toluene (100 mL). The resulting solution was stirred at 90 °C under air monitored by TLC and GC for 2.5 hours. Upon completion of the reaction, the solvents were cooled to room temperature, filtered through a pad of celite, then removed via rotary evaporator and the residue was purified with flash chromatography (silica gel, ethyl acetate: petroleum ether=1:30) to give 888.5 mg of 1,3-diphenylpropan-1-one (**2a**) in 86% isolated yield as a white solid.

## Labeling Experiments

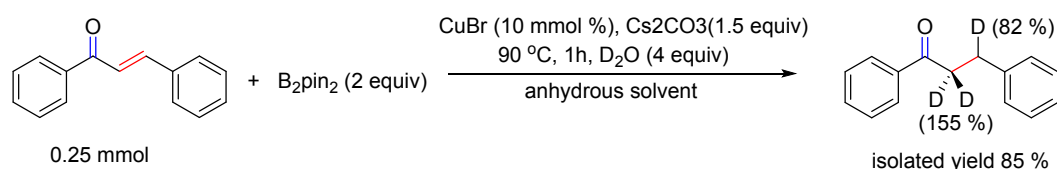

A sealed pressure vessel was charged with chalcone (**1a**) (52.0 mg, 0.25 mmol), B<sub>2</sub>pin<sub>2</sub> (127mg, 0.5mmol), CuBr (3.6 mg, 0.025 mmol), Cs<sub>2</sub>CO<sub>3</sub> (121 mg, 0.75mmol), and anhydrous THF (1 mL), anhydrous Toluene(5mL). The resulting solution was stirred at 90 °C under air monitored by TLC and GC for 1 hour. Upon completion of the reaction, the solvents were cooled to room temperature, filtered through a pad of celite, then removed via rotary evaporator and the residue was purified with flash chromatography (silica gel, ethyl acetate: petroleum ether=1:30) to give 44.6 mg of the labeled 1,3-diphenylpropan-1-one (**2**) in 85% isolated yield as a white solid.

## GC-MS Spectra

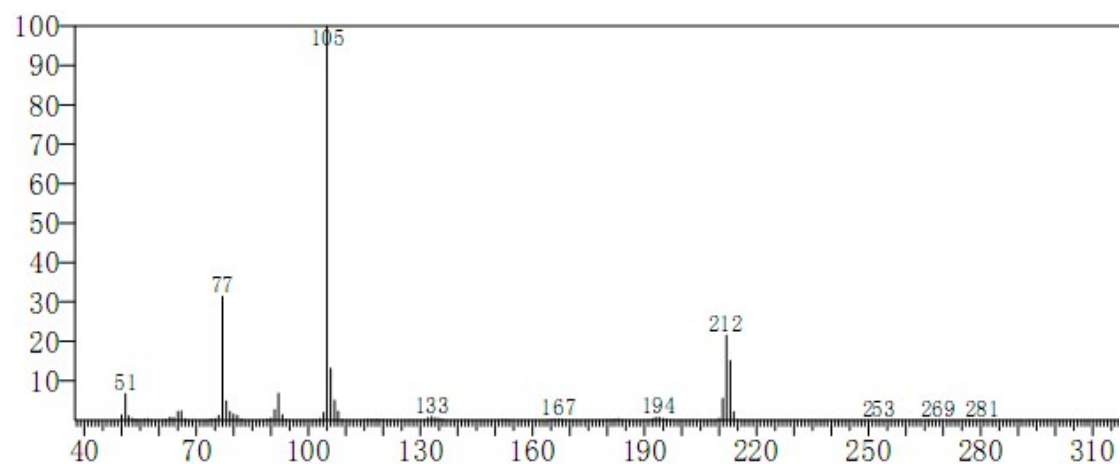

## **<sup>1</sup>H NMR Spectra**

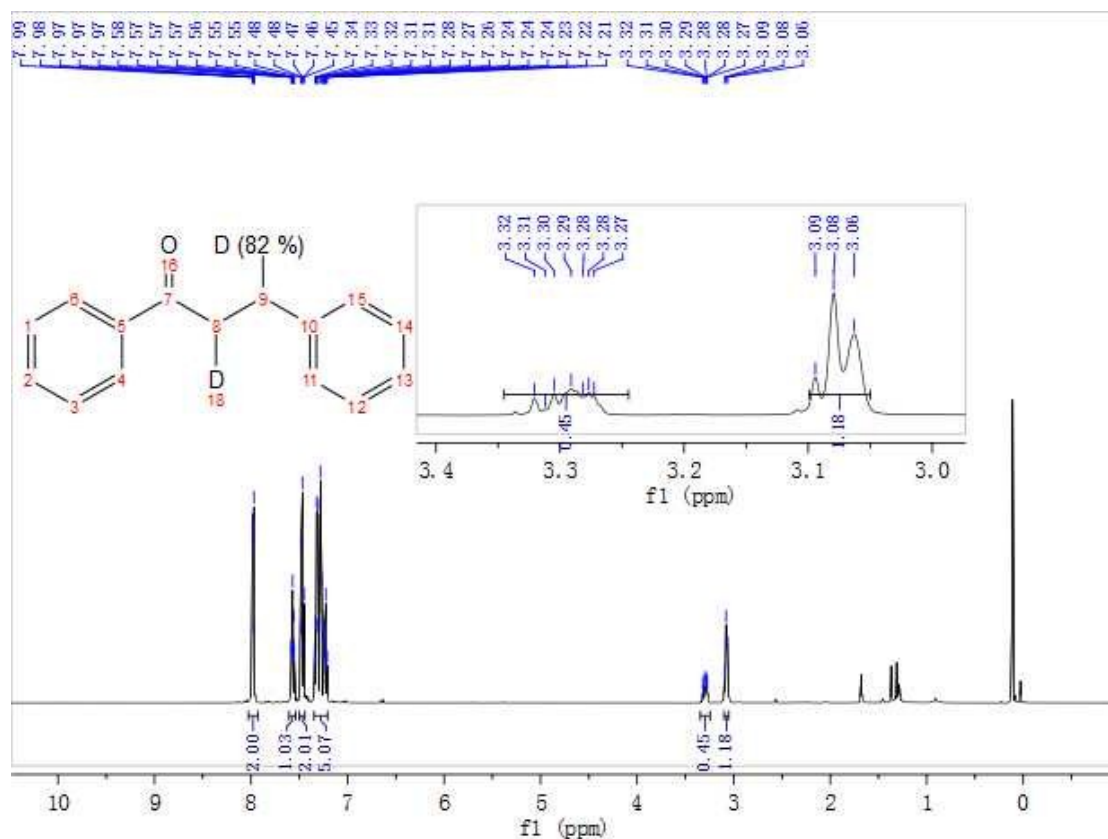

## **Characterization data for products**

### **1,3-diphenylpropan-1-one (CAS: 1083-30-3)<sup>1</sup>**

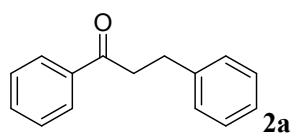

A sealed pressure vessel was charged with chalcone (**1a**) (52.0 mg, 0.25 mmol), B<sub>2</sub>pin<sub>2</sub> (127mg, 0.5mmol), CuBr (3.6 mg, 0.025 mmol), Cs<sub>2</sub>CO<sub>3</sub> (121 mg, 0.375mmol), and THF (1 mL), Toluene(5mL). The resulting solution was stirred at 90 °C under air monitored by TLC and GC for

1 hour. Upon completion of the reaction, the solvents were cooled to room temperature, filtered through a pad of celite, then removed via rotary evaporator and the residue was purified with flash chromatography (silica gel, ethyl acetate: petroleum ether=1:30) to give 47 mg of 1,3-diphenylpropan-1-one (**2a**) in 88% isolated yield as a white solid. mp = 70.1 – 71.9 °C

<sup>1</sup>H NMR (500 MHz, CDCl<sub>3</sub>) δ 7.99 – 7.97 (m, 2H), 7.59 – 7.54 (m, 1H), 7.50 – 7.43 (m, 2H), 7.35 – 7.26 (m, 4H), 7.25 – 7.21 (t, 1H), 3.32 (t, *J* = 7.6 Hz, 2H), 3.08 (t, *J* = 7.6 Hz, 2H). <sup>13</sup>C NMR (126 MHz, CDCl<sub>3</sub>) δ 199.13 (s), 141.22 (s), 136.78 (s), 132.99 (s), 128.54 (s), 128.46 (s), 128.36 (s), 127.97 (s), 126.07 (s), 40.38 (s), 30.06 (s).

### 3-(4-fluorophenyl)-1-phenylpropan-1-one (CAS: 41865-46-7)<sup>1</sup>

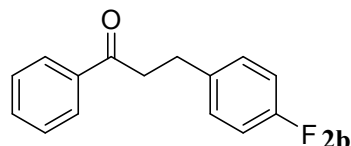

A sealed pressure vessel was charged with (E)-3-(4-fluorophenyl)-1-phenylprop-2-en-1-one (**1b**) (56.5 mg, 0.25 mmol), B<sub>2</sub>pin<sub>2</sub> (127 mg, 0.5 mmol), CuBr (3.6 mg, 0.025 mmol), Cs<sub>2</sub>CO<sub>3</sub> (121 mg, 0.375 mmol), and THF (1 mL), Toluene (5 mL). The resulting solution was stirred at 90 °C under air monitored by TLC and GC for 22 hours. Upon completion of the reaction, the solvents were cooled to room temperature, filtered through a pad of celite, then removed via rotary evaporator and the residue was purified with flash chromatography (silica gel, ethyl acetate: petroleum ether=1:30) to give 54.8 mg of 3-(4-fluorophenyl)-1-phenylpropan-1-one (**2b**) in 96% isolated yield as a white solid. mp = 61.2 – 62.1 °C

<sup>1</sup>H NMR (500 MHz, CDCl<sub>3</sub>) δ 7.97 – 7.95 (m, 2H), 7.59 – 7.53 (m, 1H), 7.50 – 7.40 (m, 2H), 7.25 – 7.17 (m, 2H), 7.02 – 6.94 (m, 2H), 3.28 (t, *J* = 7.6 Hz, 2H), 3.05 (t, *J* = 7.6 Hz, 2H). <sup>13</sup>C NMR (126 MHz, CDCl<sub>3</sub>) δ 198.94 (s), 161.33 (d, *J* = 243.8 Hz), 136.83 (d, *J* = 3.2 Hz), 136.73 (s), 133.07 (s), 129.78 (d, *J* = 7.8 Hz), 128.57 (s), 127.95 (s), 115.18 (d, *J* = 21.2 Hz), 40.35 (s), 29.19 (s).

### 1-(4-fluorophenyl)-3-phenylpropan-1-one (CAS: 41938-64-1)<sup>1</sup>

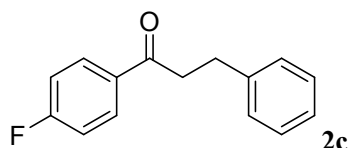

A sealed pressure vessel was charged with (E)-1-(4-fluorophenyl)-3-phenylprop-2-en-1-one (**1c**) (56.5 mg, 0.25 mmol), B<sub>2</sub>pin<sub>2</sub> (127 mg, 0.5 mmol), CuBr (3.6 mg, 0.025 mmol), Cs<sub>2</sub>CO<sub>3</sub> (121 mg, 0.375 mmol), and THF (1 mL), Toluene (5 mL). The resulting solution was stirred at 90 °C under air monitored by TLC and GC for 22 hours. Upon completion of the reaction, the solvents were cooled to room temperature, filtered through a pad of celite, then removed via rotary evaporator and the residue was purified with flash chromatography (silica gel, ethyl acetate: petroleum ether=1:30) to give 46.2 mg of 1-(4-fluorophenyl)-3-phenylpropan-1-one (**2c**) in 81% isolated yield as a light yellow liquid.

<sup>1</sup>H NMR (500 MHz, CDCl<sub>3</sub>) δ 8.00 – 7.97 (m, 2H), 7.33 – 7.21 (m, 5H), 7.14 – 7.11 (m, 2H), 3.28 (t, *J* = 7.6 Hz, 2H), 3.07 (t, *J* = 7.6 Hz, 2H). <sup>13</sup>C NMR (126 MHz, CDCl<sub>3</sub>) δ 197.54 (s), 165.66 (d, *J* = 254.6 Hz), 141.09 (s), 133.24 (d, *J* = 3.0 Hz), 130.60 (d, *J* = 9.3 Hz), 128.51 (s), 128.36 (s), 126.15 (s), 115.63 (d, *J* = 21.8 Hz), 40.32 (s), 30.06 (s).

### 1,3-bis(4-fluorophenyl)propan-1-one (CAS: 104147-29-7)<sup>2</sup>

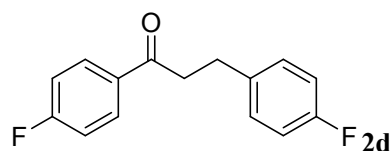

A sealed pressure vessel was charged with (E)-1,3-bis(4-fluorophenyl)prop-2-en-1-one (**1d**) (61.0 mg, 0.25 mmol),  $B_2pin_2$  (127mg, 0.5mmol), CuBr (3.6 mg, 0.025 mmol),  $Cs_2CO_3$  (121 mg, 0.375mmol), and THF (1 mL), Toluene(5mL). The resulting solution was stirred at 90 °C under air monitored by TLC and GC for 22 hours. Upon completion of the reaction, the solvents were cooled to room temperature, filtered through a pad of celite, then removed via rotary evaporator and the residue was purified with flash chromatography (silica gel, ethyl acetate: petroleum ether=1:30) to give 55.4 mg of 1,3-bis(4-fluorophenyl)propan-1-one (**2d**) in 90% isolated yield as a white solid. mp = 40.1 – 40.3 °C

$^1H$  NMR (500 MHz,  $CDCl_3$ )  $\delta$  7.99- 7.96 (m, 2H), 7.21 – 7.18 (m, 2H), 7.13 – 7.10 (m, 2H), 6.99 – 6.95 (m, 2H), 3.25 (t,  $J$  = 7.6Hz, 2H), 3.04 (t,  $J$  = 7.6Hz, 2H).  $^{13}C$  NMR (126 MHz,  $CDCl_3$ )  $\delta$  197.31 (s), 165.69 (d,  $J$  = 254.8 Hz), 161.36 (d,  $J$  = 243.9 Hz), 136.69 (d,  $J$  = 3.2 Hz), 133.18 (d,  $J$  = 3.0 Hz), 130.58 (d,  $J$  = 9.3 Hz), 129.77 (d,  $J$  = 7.8 Hz), 115.65 (d,  $J$  = 21.9 Hz), 115.21 (d,  $J$  = 21.2 Hz), 40.28 (s), 29.17 (s).

**3-(4-fluorophenyl)-1-(p-tolyl)propan-1-one (CAS: 898767-89-0)<sup>3</sup>**

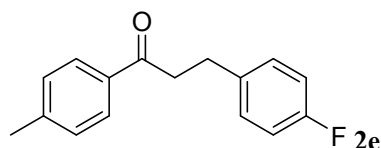

A sealed pressure vessel was charged with (E)-3-(4-fluorophenyl)-1-(p-tolyl)prop-2-en-1-one (**1e**) (61.0 mg, 0.25 mmol),  $B_2pin_2$  (127mg, 0.5mmol), CuBr (3.6 mg, 0.025 mmol),  $Cs_2CO_3$  (121 mg, 0.375mmol), and THF (1 mL), Toluene(5mL). The resulting solution was stirred at 90 °C under air monitored by TLC and GC for 22 hours. Upon completion of the reaction, the solvents were cooled to room temperature, filtered through a pad of celite, then removed via rotary evaporator and the residue was purified with flash chromatography (silica gel, ethyl acetate: petroleum ether=1:30) to give 44.5 mg of 3-(4-fluorophenyl)-1-(p-tolyl)propan-1-one (**2e**) in 73% isolated yield as a white solid. mp = 69.2-70.3 °C

$^1H$  NMR (500 MHz,  $CDCl_3$ )  $\delta$  7.88 – 7.86 (m, 1H), 7.27 – 7.20 (m, 4H), 7.00 - 6.97 (m, 2H), 3.26 (t,  $J$  = 7.6 Hz, 2H), 3.05 (t,  $J$  = 7.6 Hz, 2H), 2.42 (s, 3H).  $^{13}C$  NMR (126 MHz,  $CDCl_3$ )  $\delta$  198.62 (s), 161.31 (d,  $J$  = 243.7 Hz), 143.86 (s), 136.93 (d,  $J$  = 3.2 Hz), 134.27 (s), 129.76 (d,  $J$  = 7.8 Hz), 129.24 (s), 128.08 (s), 115.15 (d,  $J$  = 21.1 Hz), 40.23 (s), 29.29 (s), 21.57 (s).

**1-(4-chlorophenyl)-3-phenylpropan-1-one (CAS: 5739-37-7)<sup>1</sup>**

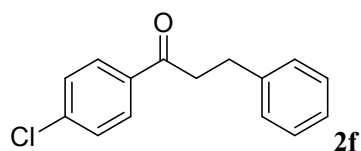

A sealed pressure vessel was charged with (E)-1-(4-chlorophenyl)-3-phenylprop-2-en-1-one (**1f**) (60.5 mg, 0.25 mmol),  $B_2pin_2$  (127mg, 0.5mmol), CuBr (3.6 mg, 0.025 mmol),  $Cs_2CO_3$  (121 mg, 0.375mmol), and THF (1 mL), Toluene(5mL). The resulting solution was stirred at 90 °C under air monitored by TLC and GC for 8 hours. Upon completion of the reaction, the solvents were cooled to room temperature, filtered through a pad of celite, then removed via rotary evaporator

and the residue was purified with flash chromatography (silica gel, ethyl acetate: petroleum ether=1:30) to give 55.5 mg of 1-(4-chlorophenyl)-3-phenylpropan-1-one (**2f**) in 91% isolated yield as a white solid. mp = 78.1 – 78.4 °C

<sup>1</sup>H NMR (500 MHz, CDCl<sub>3</sub>) δ 7.81 – 7.78 (m, 2H), 7.34 – 7.32 (m, 2H), 7.23 – 7.20 (m, 2H), 7.17 – 7.11 (m, 3H), 3.18 (t, *J* = 7.7 Hz, 1H), 2.97 (t, *J* = 7.7 Hz, 1H). <sup>13</sup>C NMR (126 MHz, CDCl<sub>3</sub>) δ 197.89 (s), 141.00 (s), 139.43 (s), 135.09 (s), 129.40 (s), 128.86 (s), 128.51 (s), 128.35 (s), 126.17 (s), 40.37 (s), 29.99 (s).

### 3-(4-chlorophenyl)-1-phenylpropan-1-one (CAS: 5739-39-9)<sup>1</sup>

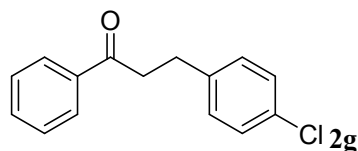

A sealed pressure vessel was charged with (E)-3-(4-chlorophenyl)-1-phenylprop-2-en-1-one (**1g**) (60.5 mg, 0.25 mmol), B<sub>2</sub>pin<sub>2</sub> (127mg, 0.5mmol), CuBr (3.6 mg, 0.025 mmol), Cs<sub>2</sub>CO<sub>3</sub> (121 mg, 0.375mmol), and THF (1 mL), Toluene(5mL). The resulting solution was stirred at 90 °C under air monitored by TLC and GC for 1 hour. Upon completion of the reaction, the solvents were cooled to room temperature, filtered through a pad of celite, then removed via rotary evaporator and the residue was purified with flash chromatography (silica gel, ethyl acetate: petroleum ether=1:30) to give 47.6 mg of 3-(4-chlorophenyl)-1-phenylpropan-1-one (**2g**) in 78% isolated yield as a white solid. mp = 58.3 – 58.8 °C

<sup>1</sup>H NMR (500 MHz, CDCl<sub>3</sub>) δ 7.89 – 7.81 (m, 2H), 7.50 – 7.43 (m, 1H), 7.40 – 7.32 (m, 2H), 7.16 (dt, *J* = 7.1, 2.2 Hz, 2H), 7.12 – 7.05 (m, 2H), 3.19 (t, *J* = 7.5 Hz, 2H), 2.95 (t, *J* = 7.5 Hz, 2H).

<sup>13</sup>C NMR (126 MHz, CDCl<sub>3</sub>) δ 198.76 (s), 139.68 (s), 136.67 (s), 133.11 (s), 131.79 (s), 129.77 (s), 128.58 (s), 128.53 (s), 127.95 (s), 40.07 (s), 29.31 (s).

### 3-(4-methoxyphenyl)-1-phenylpropan-1-one (CAS: 1669-49-4)<sup>1</sup>

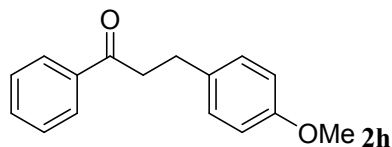

A sealed pressure vessel was charged with (E)-3-(4-methoxyphenyl)-1-phenylprop-2-en-1-one (**1h**) (59.5 mg, 0.25 mmol), B<sub>2</sub>pin<sub>2</sub> (127mg, 0.5mmol), CuBr (3.6 mg, 0.025 mmol), Cs<sub>2</sub>CO<sub>3</sub> (121 mg, 0.375mmol), and THF (1 mL), Toluene(5mL). The resulting solution was stirred at 90 °C under air monitored by TLC and GC for 22 hours. Upon completion of the reaction, the solvents were cooled to room temperature, filtered through a pad of celite, then removed via rotary evaporator and the residue was purified with flash chromatography (silica gel, ethyl acetate: petroleum ether=1:10) to give 37.8 mg of 3-(4-methoxyphenyl)-1-phenylpropan-1-one (**2h**) in 63% isolated yield as a white solid. mp = 59.3 – 60.1 °C

<sup>1</sup>H NMR (500 MHz, CDCl<sub>3</sub>) δ 7.99 – 7.90 (m, 2H), 7.59 – 7.52 (m, 1H), 7.50 – 7.40 (m, 2H), 7.18 (d, *J* = 8.6 Hz, 2H), 6.88 – 6.80 (m, 2H), 3.79 (s, 3H), 3.28 (t, *J* = 7.5 Hz, 2H), 3.02 (t, *J* = 7.5 Hz, 2H). <sup>13</sup>C NMR (126 MHz, CDCl<sub>3</sub>) δ 199.34 (s), 157.94 (s), 136.85 (s), 133.26 (s), 132.99 (s), 129.31 (s), 128.55 (s), 127.99 (s), 113.89 (s), 55.23 (s), 40.67 (s), 29.24 (s).

### 1-(4-methoxyphenyl)-3-phenylpropan-1-one (CAS: 5739-38-8)<sup>1</sup>

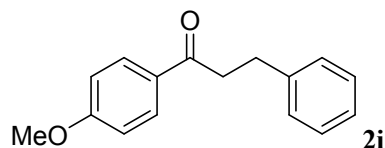

A sealed pressure vessel was charged with (E)-1-(4-methoxyphenyl)-3-phenylprop-2-en-1-one (**1i**) (59.5 mg, 0.25 mmol), B<sub>2</sub>pin<sub>2</sub> (127mg, 0.5mmol), CuBr (3.6 mg, 0.025 mmol), Cs<sub>2</sub>CO<sub>3</sub> (121 mg, 0.375mmol), and THF (1 mL), Toluene(5mL). The resulting solution was stirred at 90 °C under air monitored by TLC and GC for 22 hour. Upon completion of the reaction, the solvents were cooled to room temperature, filtered through a pad of celite, then removed via rotary evaporator and the residue was purified with flash chromatography (silica gel, ethyl acetate: petroleum ether=1:10) to give 43.2 mg of 1-(4-methoxyphenyl)-3-phenylpropan-1-one (**2i**) in 72% isolated yield as a white solid. mp = 95.7 – 98.1 °C

<sup>1</sup>H NMR (500 MHz, CDCl<sub>3</sub>) δ 7.98 – 7.92 (m, 2H), 7.34 – 7.18 (m, 5H), 6.96 – 6.90 (m, 2H), 3.87 (s, 3H), 3.26 (t, *J* = 7.5 Hz, 2H), 3.07 (t, *J* = 7.5 Hz, 2H). <sup>13</sup>C NMR (126 MHz, CDCl<sub>3</sub>) δ 197.74 (s), 163.38 (s), 141.41 (s), 130.24 (s), 129.89 (s), 128.44(s), 128.37(s), 126.02 (s), 113.66 (s), 55.40 (s), 40.06 (s), 30.27 (s).

#### 3-(3,4-dimethoxyphenyl)-1-phenylpropan-1-one (CAS: 7468-58-8)<sup>4</sup>

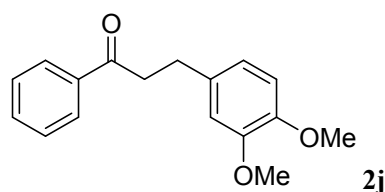

A sealed pressure vessel was charged with (E)-3-(3,4-dimethoxyphenyl)-1-phenylprop-2-en-1-one (**1j**) (67.0 mg, 0.25 mmol), B<sub>2</sub>pin<sub>2</sub> (127mg, 0.5mmol), CuBr (3.6 mg, 0.025 mmol), Cs<sub>2</sub>CO<sub>3</sub> (121 mg, 0.375mmol), and THF (1 mL), Toluene(5mL). The resulting solution was stirred at 90 °C under air monitored by TLC and GC for 22 hours. Upon completion of the reaction, the solvents were cooled to room temperature, filtered through a pad of celite, then removed via rotary evaporator and the residue was purified with flash chromatography (silica gel, ethyl acetate: petroleum ether=1:3) to give 44.6 mg of 3-(3,4-dimethoxyphenyl)-1-phenylpropan-1-one (**2j**) in 66% isolated yield as a white solid. mp = 68.5 - 69.2 °C

<sup>1</sup>H NMR (500 MHz, CDCl<sub>3</sub>) δ 7.99 – 7.91 (m, 2H), 7.59 – 7.51 (m, 1H), 7.44 (dd, *J* = 10.6, 4.7 Hz, 2H), 6.84 – 6.73 (m, 3H), 3.86 (s, 3H), 3.85 (s, 3H), 3.28 (t, *J* = 7.6 Hz, 2H), 3.02 (t, *J* = 7.6 Hz, 2H). <sup>13</sup>C NMR (126 MHz, CDCl<sub>3</sub>) δ 199.30 (s), 148.82 (s), 147.31 (s), 136.82 (s), 133.82 (s), 132.98 (s), 128.53 (s), 127.95 (s), 120.10 (s), 111.76 (s), 111.26 (s), 55.86(s), 55.76 (s), 40.62 (s), 29.74 (s).

#### 1-(4-hydroxyphenyl)-3-phenylpropan-1-one (CAS: 36941-00-1)<sup>5</sup>

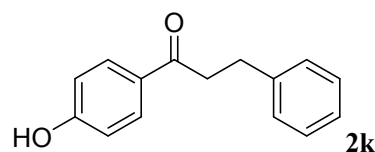

A sealed pressure vessel was charged with (E)-1-(4-hydroxyphenyl)-3-phenylprop-2-en-1-one (**1k**) (56.0 mg, 0.25 mmol), B<sub>2</sub>pin<sub>2</sub> (127mg, 0.5mmol), CuBr (3.6 mg, 0.025 mmol), Cs<sub>2</sub>CO<sub>3</sub> (121 mg, 0.375mmol), and THF (1 mL), Toluene(5mL). The resulting solution was stirred at 90 °C under air monitored by TLC and GC for 22 hours. Upon completion of the reaction, the solvents were



cooled to room temperature, filtered through a pad of celite, then removed via rotary evaporator and the residue was purified with flash chromatography (silica gel, ethyl acetate: petroleum ether=1:5) to give 25.5 mg of 1-(4-hydroxyphenyl)-3-phenylpropan-1-one (**2k**) in 45% isolated yield as a white solid. mp = 73.6 – 74.5 °C

<sup>1</sup>H NMR (500 MHz, CDCl<sub>3</sub>) δ 7.93 – 7.86 (m, 2H), 7.31 – 7.19 (m, 5H), 6.92 – 6.84 (m, 2H), 6.63 (s, 1H), 3.26 (t, *J* = 7.6 Hz, 2H), 3.06 (t, *J* = 7.6 Hz, 2H). <sup>13</sup>C NMR (126 MHz, CDCl<sub>3</sub>) δ 198.61 (s), 160.48 (s), 141.24 (s), 130.72 (s), 129.75 (s), 128.50(s), 128.38 (s), 126.11 (s), 115.41 (s), 40.10 (s), 30.41 (s).

### 3-(thiophen-2-yl)-1-(p-tolyl)propan-1-one (CAS: 654674-60-9)<sup>6</sup>

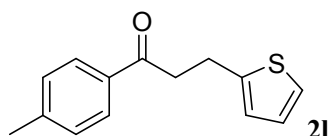

A sealed pressure vessel was charged with (E)-3-(thiophen-2-yl)-1-(p-tolyl)prop-2-en-1-one (**1l**) (57.0 mg, 0.25 mmol), B<sub>2</sub>pin<sub>2</sub> (127mg, 0.5mmol), CuBr (3.6 mg, 0.025 mmol), Cs<sub>2</sub>CO<sub>3</sub> (121 mg, 0.375mmol), and THF (1 mL), Toluene(5mL). The resulting solution was stirred at 90 °C under air monitored by TLC and GC for 8 hours. Upon completion of the reaction, the solvents were cooled to room temperature, filtered through a pad of celite, then removed via rotary evaporator and the residue was purified with flash chromatography (silica gel, ethyl acetate: petroleum ether=1:30) to give 49.5 mg of 3-(thiophen-2-yl)-1-(p-tolyl)propan-1-one (**2l**) in 86% isolated yield as a white solid. mp = 37.5 – 38.1 °C

<sup>1</sup>H NMR (500 MHz, CDCl<sub>3</sub>) δ 7.92 – 7.79 (m, 2H), 7.27 – 7.24 (m, 2H), 7.13 (dd, *J* = 5.1, 1.2 Hz, 1H), 6.92 (dd, *J* = 5.1, 3.4 Hz, 1H), 6.90 – 6.80 (m, 1H), 3.36 – 3.33 (m, 2H), 3.30 – 3.27 (m, 2H), 2.41 (s, 3H). <sup>13</sup>C NMR (126 MHz, CDCl<sub>3</sub>) δ 198.21 (s), 143.97(s), 143.93 (s), 134.23 (s), 129.27 (s), 128.12 (s), 126.80 (s), 124.59 (s), 123.30 (s), 40.39 (s), 24.25 (s), 21.62 (s).

### 2-benzyl-3,4-dihydronaphthalen-1(2H)-one (CAS: 27019-08-5)<sup>7</sup>

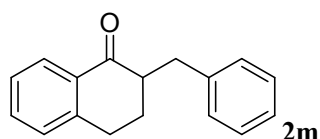

A sealed pressure vessel was charged with (E)-2-benzylidene-3,4-dihydronaphthalen-1(2H)-one (**1m**) (58.5 mg, 0.25 mmol), B<sub>2</sub>pin<sub>2</sub> (127mg, 0.5mmol), CuBr (3.6 mg, 0.025 mmol), Cs<sub>2</sub>CO<sub>3</sub> (121 mg, 0.375mmol), and THF (1 mL), Toluene(5mL). The resulting solution was stirred at 90 °C under air monitored by TLC and GC for 8 hours. Upon completion of the reaction, the solvents were cooled to room temperature, filtered through a pad of celite, then removed via rotary evaporator and the residue was purified with flash chromatography (silica gel, ethyl acetate: petroleum ether=1:30) to give 46 mg of 2-benzyl-3,4-dihydronaphthalen-1(2H)-one (**2m**) in 78% isolated yield as a white solid. mp = 53.4 – 54.1 °C

<sup>1</sup>H NMR (500 MHz, CDCl<sub>3</sub>) δ 8.09 (dd, *J* = 7.9, 1.1 Hz, 1H), 7.49 – 7.45 (m, 1H), 7.35 – 7.29 (m, 3H), 7.26 – 7.21 (m, 4H), 3.51 (dd, *J* = 13.7, 4.1 Hz, 1H), 2.98 – 2.89 (m, 2H), 2.79- 2.73 (m, 1H), 2.66 (dd, *J* = 13.7, 9.6 Hz, 1H), 2.15 – 2.09 (m, 1H), 1.84 – 1.76 (m, 1H). <sup>13</sup>C NMR (126 MHz, CDCl<sub>3</sub>) δ 199.31 (s), 143.97 (s), 139.98 (s), 133.21 (s), 132.40 (s), 129.20 (s), 128.66 (s), 128.34 (s), 127.48 (s), 126.56 (s), 126.07 (s), 49.39 (s), 35.62 (s), 28.57 (s), 27.61 (s).

### ethyl 4-oxo-4-phenylbutanoate (CAS: 6270-17-3)<sup>9</sup>

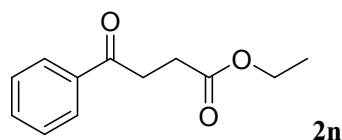

A sealed pressure vessel was charged with ethyl (E)-4-oxo-4-phenylbut-2-enoate (**1n**) (51.0 mg, 0.25 mmol), B<sub>2</sub>pin<sub>2</sub> (127mg, 0.5mmol), CuBr (3.6 mg, 0.025 mmol), Cs<sub>2</sub>CO<sub>3</sub> (121 mg, 0.375mmol), and THF (1 mL), Toluene(5mL). The resulting solution was stirred at 90 °C under air monitored by TLC and GC for 1 hour. Upon completion of the reaction, the solvents were cooled to room temperature, filtered through a pad of celite, then removed via rotary evaporator and the residue was purified with flash chromatography (silica gel, ethyl acetate: petroleum ether=1:30) to give 38.1 mg of ethyl 4-oxo-4-phenylbutanoate (**2n**) in 74% isolated yield as a white solid. mp = 165.1 – 166.1 °C

<sup>1</sup>H NMR (500 MHz, CDCl<sub>3</sub>) δ 8.02 – 7.89 (m, 2H), 7.54 (dd, *J* = 10.7, 4.1 Hz, 1H), 7.44 (t, *J* = 7.6 Hz, 2H), 4.14 (q, *J* = 7.1 Hz, 2H), 3.29 (t, *J* = 6.6 Hz, 2H), 2.73 (t, *J* = 6.6 Hz, 2H), 1.24 (t, *J* = 7.1 Hz, 3H). <sup>13</sup>C NMR (126 MHz, CDCl<sub>3</sub>) δ 198.08 (s), 172.84 (s), 136.52 (s), 133.14 (s), 128.54 (s), 127.97 (s), 60.59 (s), 33.33 (s), 28.24 (s), 14.14 (s).

#### 4-phenylbutan-2-one (CAS: 2550-26-7)<sup>2</sup>

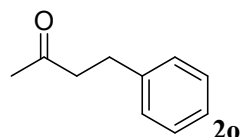

A sealed pressure vessel was charged with (E)-4-phenylbut-3-en-2-one (**1o**) (36.5 mg, 0.25 mmol), B<sub>2</sub>pin<sub>2</sub> (127mg, 0.5mmol), CuBr (3.6 mg, 0.025 mmol), Cs<sub>2</sub>CO<sub>3</sub> (121 mg, 0.375mmol), and THF (1 mL), Toluene(5mL). The resulting solution was stirred at 90 °C under air monitored by TLC and GC for 22 hours. Upon completion of the reaction, the solvents were cooled to room temperature, filtered through a pad of celite, then removed via rotary evaporator and the residue was purified with flash chromatography (silica gel, ethyl acetate: petroleum ether=1:30) to give 30.7 mg of 4-phenylbutan-2-one (**2o**) in 83% isolated yield as a colorless liquid.

A sealed pressure vessel was charged with 4-phenylbut-3-yn-2-one (**1r**) (36 mg, 0.25 mmol), B<sub>2</sub>pin<sub>2</sub> (254mg, 1mmol), CuBr (3.6 mg, 0.025 mmol), Cs<sub>2</sub>CO<sub>3</sub> (242 mg, 0.75mmol), and THF (1 mL), Toluene(5mL). The resulting solution was stirred at 90 °C under air monitored by TLC and GC for 22 hours. Upon completion of the reaction, the solvents were cooled to room temperature, filtered through a pad of celite, then removed via rotary evaporator and the residue was purified with flash chromatography (silica gel, ethyl acetate: petroleum ether=1:30) to give 26 mg of 4-phenylbutan-2-one (**2o**) in 71% isolated yield as a colorless liquid.

<sup>1</sup>H NMR (500 MHz, CDCl<sub>3</sub>) δ 7.28 (dd, *J* = 8.2, 6.8 Hz, 2H), 7.22 – 7.16 (m, 3H), 2.90 (t, *J* = 7.6 Hz, 2H), 2.76 (t, *J* = 7.6 Hz, 2H), 2.14 (s, 3H). <sup>13</sup>C NMR (126 MHz, CDCl<sub>3</sub>) δ 207.91 (s), 140.93 (s), 128.44 (s), 128.23 (s), 126.06 (s), 45.12 (s), 30.03 (s), 29.68 (s).

#### 1,5-diphenylpentan-3-one (CAS: 5396-91-8)<sup>10</sup>

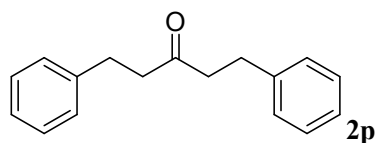

A sealed pressure vessel was charged with (1E,4E)-1,5-diphenylpenta-1,4-dien-3-one (**1p**) (58.5 mg, 0.25 mmol), B<sub>2</sub>pin<sub>2</sub> (254mg, 1mmol), CuBr (3.6 mg, 0.025 mmol), Cs<sub>2</sub>CO<sub>3</sub> (242 mg, 0.75mmol), and THF (1 mL), Toluene(5mL). The resulting solution was stirred at 90 °C under air monitored by TLC and GC for 22 hours. Upon completion of the reaction, the solvents were cooled to room temperature, filtered through a pad of celite, then removed via rotary evaporator and the residue was purified with flash chromatography (silica gel, ethyl acetate: petroleum ether=1:30) to give 37.5 mg of 1,5-diphenylpentan-3-one (**2p**) in 63% isolated yield as a colorless liquid.

<sup>1</sup>H NMR (500 MHz, CDCl<sub>3</sub>) δ 7.29 (dd, *J* = 10.3, 4.6 Hz, 4H), 7.22 – 7.16 (m, 6H), 2.91 (t, *J* = 7.6 Hz, 4H), 2.73 (t, *J* = 7.6 Hz, 4H). <sup>13</sup>C NMR (126 MHz, CDCl<sub>3</sub>) δ 209.07 (s), 140.95 (s), 128.45 (s), 128.26 (s), 126.06 (s), 44.46 (s), 29.68 (s).

**1,4-diphenylbutane-1,4-dione (CAS: 495-71-6)<sup>8</sup>**

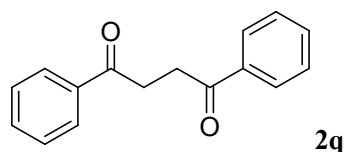

A sealed pressure vessel was charged with (E)-1,4-diphenylbut-2-ene-1,4-dione (**1q**) (52.0 mg, 0.25 mmol), B<sub>2</sub>pin<sub>2</sub> (127mg, 0.5mmol), CuBr (3.6 mg, 0.025 mmol), Cs<sub>2</sub>CO<sub>3</sub> (121 mg, 0.375mmol), and THF (1 mL), Toluene(5mL). The resulting solution was stirred at 90 °C under air monitored by TLC and GC for 1 hour. Upon completion of the reaction, the solvents were cooled to room temperature, filtered through a pad of celite, then removed via rotary evaporator and the residue was purified with flash chromatography (silica gel, ethyl acetate: petroleum ether=1:30) to give 44 mg of 1,4-diphenylbutane-1,4-dione (**2q**) in 74% isolated yield as a white solid. mp = 144.1 – 145 °C

<sup>1</sup>H NMR (500 MHz, CDCl<sub>3</sub>) δ 8.10 – 7.98 (m, 4H), 7.61 – 7.53 (m, 2H), 7.52 – 7.43 (m, 4H), 3.47 (s, 4H). <sup>13</sup>C NMR (126 MHz, CDCl<sub>3</sub>) δ 198.63 (s), 136.71 (s), 133.11 (s), 128.55 (s), 128.07 (s), 32.54 (s).

**(E)-3-phenyl-1-(4-(phenylethynyl)phenyl)prop-2-en-1-one (new compound)**

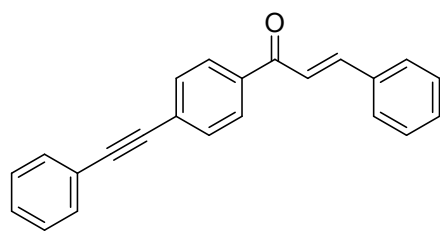

(E)-3-phenyl-1-(4-(phenylethynyl)phenyl)prop-2-en-1-one was prepared from Boumendje's work<sup>11</sup> with a little change. A sealed pressure vessel was charged with 1-(4-(phenylethynyl)phenyl)ethan-1-one (440mg, 2mmol), benzaldehyde(212mg, 2mmol), NaOH(8mg, 0.2mmol), MeOH(10 mL), The resulting solution was stirred at room temperature for overnight. Upon completion of the reaction, the solvents were filtered through a pad of celite, then removed via rotary evaporator and the residue was purified with flash chromatography (silica gel, ethyl acetate: petroleum ether=1:30) to get the product (E)-3-phenyl-1-(4-(phenylethynyl)phenyl)prop-2-en-1-one (**1s**) as a brown solid. mp = 132.3 – 133.6 °C

<sup>1</sup>H NMR (500 MHz, CDCl<sub>3</sub>) δ 8.05 – 8.00 (m, 2H), 7.84 (d, *J* = 15.7 Hz, 1H), 7.70 – 7.63 (m, 4H), 7.59 – 7.52 (m, 3H), 7.44 – 7.36 (m, 6H). <sup>13</sup>C NMR (126 MHz, CDCl<sub>3</sub>) δ 189.42 (s), 145.02 (s),

137.27 (s), 134.74 (s), 131.70 (s), 130.60 (s), 128.92 (s), 128.74 (s), 128.53 – 128.29 (m), 127.84 (s), 122.63 (s), 121.63 (s), 92.66 (s), 88.71 (s). HRMS  $m/z$  (EI) calcd for  $(M + H)^+$ , 308.1201, found 309.1274.

**3-phenyl-1-(4-(phenylethynyl)phenyl)propan-1-one (new compound)**

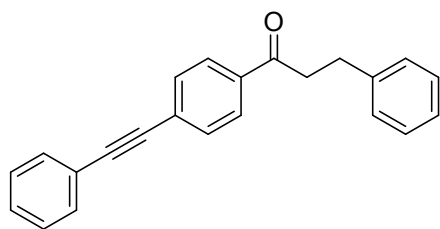

**2s**

A sealed pressure vessel was charged with (E)-3-phenyl-1-(4-(phenylethynyl)phenyl)prop-2-en-1-one (**1s**) (77.0 mg, 0.25 mmol),  $B_2pin_2$  (127mg, 0.5mmol), CuBr (3.6 mg, 0.025 mmol),  $Cs_2CO_3$  (121 mg, 0.375mmol), and THF (1 mL), Toluene(5mL). The resulting solution was stirred at 90 °C under air monitored by TLC and GC for 3 hours. Upon completion of the reaction, the solvents were cooled to room temperature, filtered through a pad of celite, then removed via rotary evaporator and the residue was purified with flash chromatography (silica gel, ethyl acetate: petroleum ether=1:30) to give 47.2 mg of 3-phenyl-1-(4-(phenylethynyl)phenyl)propan-1-one (**2s**) in 61% isolated yield as a white solid. mp = 115.4 – 116. 7 °C

$^1H$  NMR (500 MHz,  $CDCl_3$ )  $\delta$  7.98 – 7.90 (m, 2H), 7.62 – 7.54 (m, 4H), 7.39 – 7.35 (m, 3H), 7.31 (dd,  $J$  = 10.2, 4.6 Hz, 2H), 7.28 – 7.25 (m, 2H), 7.22 (dd,  $J$  = 10.1, 4.3 Hz, 1H), 3.31 (t,  $J$  = 7.6 Hz, 2H), 3.08 (t,  $J$  = 7.6 Hz, 2H).  $^{13}C$  NMR (126 MHz,  $CDCl_3$ )  $\delta$  198.40 (s), 141.14 (s), 135.87 (s), 131.72, 131.70 (s), 128.79 (s), 128.53(s), 128.42 (s), 128.40(s), 128.13 (s), 127.98(s), 126.16 (s), 122.62 (s), 92.69 (s), 88.58 (s), 40.49 (s), 30.08 (s). HRMS  $m/z$  (EI) calcd for  $(M + H)^+$ , 311.1436, found 311.1430.

**(E)-1-phenyl-3-(4-vinylphenyl)prop-2-en-1-one (CAS: 25917-08-2 )**

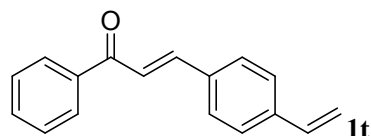

**1t**

(E)-1-phenyl-3-(4-vinylphenyl)prop-2-en-1-one was prepared from Brown's<sup>12</sup> work with a little change. A sealed pressure vessel was charged with a solution of potassium vinyltrifluoroborate (134 mg, 1.00 mmol),  $PdCl_2$  (3.5 mg, 0.02 mmol),  $PPh_3$  (16 mg, 0.06 mmol),  $Cs_2CO_3$  (978 mg, 3.00 mmol), and (E)-3-(4-bromophenyl)-1-phenylprop-2-en-1-one (286 mg, 1.00 mmol) in THF/ $H_2O$  (9:1) (2 mL) was heated at 85 °C under an  $N_2$  atmosphere in a sealed tube. The reaction mixture was stirred at 85 °C for 22 h, then cooled to room temperature and diluted with  $H_2O$  (3 mL) followed by extraction with  $CH_2Cl_2$  (10 mL  $\times$  3). The solvent was removed in vacuo, and the crude product was purified by silica gel chromatography (eluting with 20:1 n-pentane ether) to yield (E)-1-phenyl-3-(4-vinylphenyl)prop-2-en-1-one as a white solid (187 mg, 0.8 mmol, 80%)

$^1H$  NMR (400 MHz,  $CDCl_3$ )  $\delta$  8.09 – 8.01 (m, 2H), 7.82 (d,  $J$  = 15.7 Hz, 1H), 7.69 – 7.43 (m, 8H), 6.76 (dd,  $J$  = 17.6, 10.9 Hz, 1H), 5.86 (d,  $J$  = 17.6 Hz, 1H), 5.37 (d,  $J$  = 11.0 Hz, 1H).  $^{13}C$  NMR (101 MHz,  $CDCl_3$ )  $\delta$  190.51 (s), 144.36 (s), 139.82 (s), 138.32 (s), 136.15 (s), 134.38 (s), 132.74 (s), 128.76 (s), 128.63 (s), 128.50 (s), 126.77 (s), 121.85 (s), 115.45 (s).

**1-phenyl-3-(4-vinylphenyl)propan-1-one (CAS: 93318-87-7)**

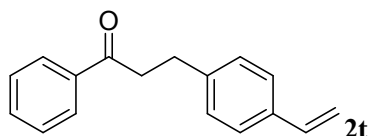

(E)-1-phenyl-3-(4-vinylphenyl)prop-2-en-1-one (**1t**) (58.5 mg, 0.25 mmol), B<sub>2</sub>pin<sub>2</sub> (127mg, 0.5mmol), CuBr (3.6 mg, 0.025 mmol), Cs<sub>2</sub>CO<sub>3</sub> (121 mg, 0.375mmol), and THF (1 mL), Toluene(5mL). The resulting solution was stirred at 90 °C under air monitored by TLC and GC for 8 hours. Upon completion of the reaction, the solvents were cooled to room temperature, filtered through a pad of celite, then removed via rotary evaporator and the residue was purified with flash chromatography (silica gel, ethyl acetate: petroleum ether=1:30) to give 41.8 mg of 1-phenyl-3-(4-vinylphenyl)propan-1-one (**2t**) in 72% isolated yield as a white solid.

<sup>1</sup>H NMR (400 MHz, CDCl<sub>3</sub>) δ 8.08 – 7.89 (m, 2H), 7.59 (t, *J* = 7.4 Hz, 1H), 7.48 (t, *J* = 7.6 Hz, 2H), 7.38 (d, *J* = 8.1 Hz, 2H), 7.25 (d, *J* = 8.1 Hz, 2H), 6.73 (dd, *J* = 17.6, 10.9 Hz, 1H), 5.74 (dd, *J* = 17.6, 0.5 Hz, 1H), 5.24 (d, *J* = 11.3 Hz, 1H), 3.32 (t, *J* = 7.6 Hz, 2H), 3.10 (t, *J* = 7.6 Hz, 2H). <sup>13</sup>C NMR (101 MHz, CDCl<sub>3</sub>) δ 199.14 (s), 141.01 (s), 136.92 (s), 136.60 (s), 135.66 (s), 133.06 (s), 128.61 (s), 128.05 (s), 126.39 (s), 113.22 (s), 40.31 (s), 29.87 (s).

**1,3-diphenyl-3-(4,4,5,5-tetramethyl-1,3,2-dioxaborolan-2-yl)propan-1-one (CAS: 199999-46-7)<sup>13</sup>**

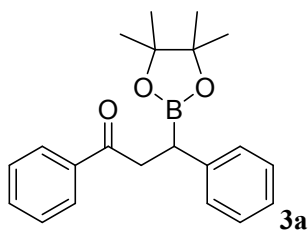

1,3-diphenyl-3-(4,4,5,5-tetramethyl-1,3,2-dioxaborolan-2-yl)propan-1-one (**4**) was prepared from Taku's work.<sup>12</sup> white solid. mp = 74.5 – 75.4 °C

<sup>1</sup>H NMR (500 MHz, CDCl<sub>3</sub>) δ 8.00 – 7.95 (m, 2H), 7.54 (dd, *J* = 10.5, 4.3 Hz, 1H), 7.44 (t, *J* = 7.7 Hz, 2H), 7.35 – 7.26 (m, 4H), 7.21 – 7.12 (m, 1H), 3.57 (dd, *J* = 18.3, 10.9 Hz, 1H), 3.43 (dd, *J* = 18.3, 5.0 Hz, 1H), 2.81 (dd, *J* = 10.9, 5.0 Hz, 1H), 1.26 (s, 6H), 1.18 (s, 6H). <sup>13</sup>C NMR (126 MHz, CDCl<sub>3</sub>) δ 199.63 (s), 141.90 (s), 136.73 (s), 132.88 (s), 128.47 (s), 128.44 (s), 128.34 (s), 128.00 (s), 125.55 (s), 83.33 (s), 43.23 (s), 24.53 (s), 24.49 (s).

## References

1. Ding.B., Zhang. Z., Liu., Y., Sugiya. M., Imamoto. T., Zhang. W., *Org. lett.*, **2013**, *15*, 3690.
2. Shang. J-Y., Li. F., Bai. X-F., *Eur. J. Org. Chem.*, **2012**, *14*, 2809.
3. Feng. H., Li. Y., Van der Eycken. E. V., Peng. Y., Song. G., *Tetrahedron Lett.*, **2012**, *53*, 1160.
4. Li, F., Wang. N., *J. Org. Chem.*, **2014**, *79*, 10447.
5. Colbon. P., Ruan. J., Purdie. M., Xiao. J., *Org. Lett.*, **2010**, *12*, 3670.
6. Che. J., Lam. Y., *Synlett*, **2010**, *16*, 2415.
7. Xu. Q., Chen. J., Tian. H., Yuan. X., Li. S., Zhou. C., Liu. J., *Angew. Chem., Int. Ed.*, **2014**, *53*, 225.
8. Mizar. P., Wirth. T., *Angew.Chem., Int.Ed.*, **2014**, *53*, 5993.

9. Hu. B., Chen. H., Liu. Y., Dong. W., Ren. K., Xie. X., Xu. H., Zhang.Z., *Chem.Comm.*, **2014**, 50, 13547.
10. Wu. J., Yang. X., He. Z., Mao. X., Hatton. T. A., Jamison. T. F., *Angew. Chem., Int. Ed.*, **2014**, 53, 8416.
11. Boumendje. A., Boccard. J., Carrupt, P-A., Nicolle. E., Blanc.M., Geze. A., Choisnard. L., Wouessidjewe. D., Matera. E-L., Dumontet. C., *J. Med. Chem*, **2008**, 51, 2307.
12. Molander, G. A.; Brown, A, R. *J. Org. Chem.* **2006**, 71, 9681.
13. Taku. K., Xu. P., Kobayashi. S., *Chem - Asian J.* **2014**, 9, 179.

## NMR Spectra

1,3-diphenylpropan-1-one (CAS: 1083-30-3)<sup>1</sup>

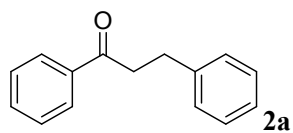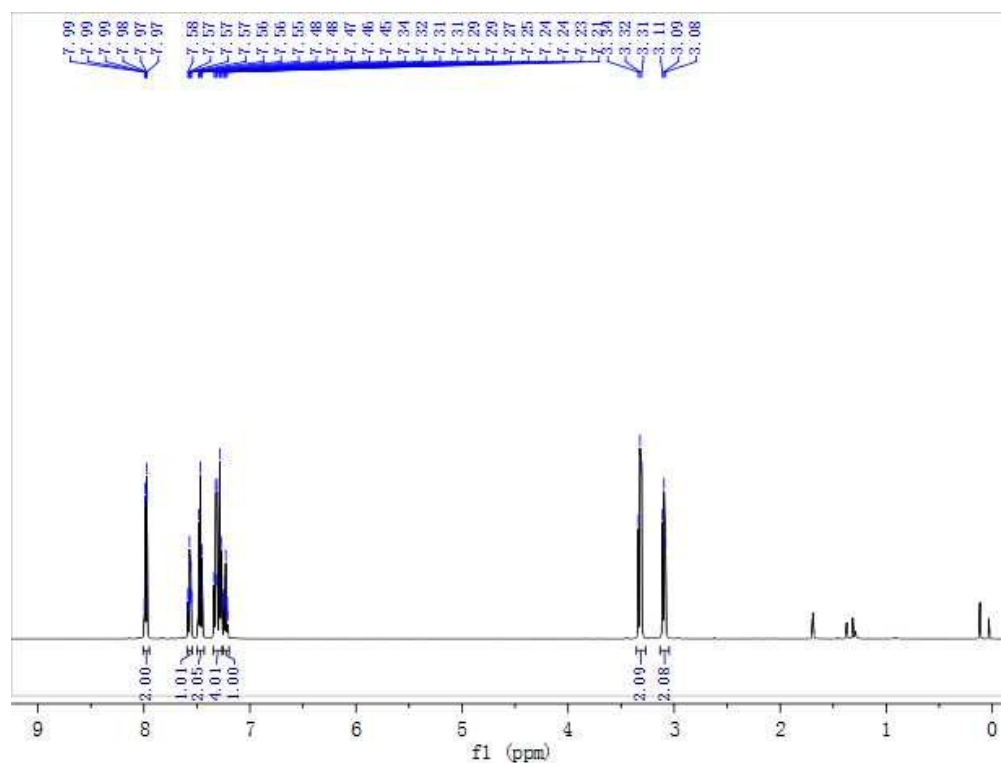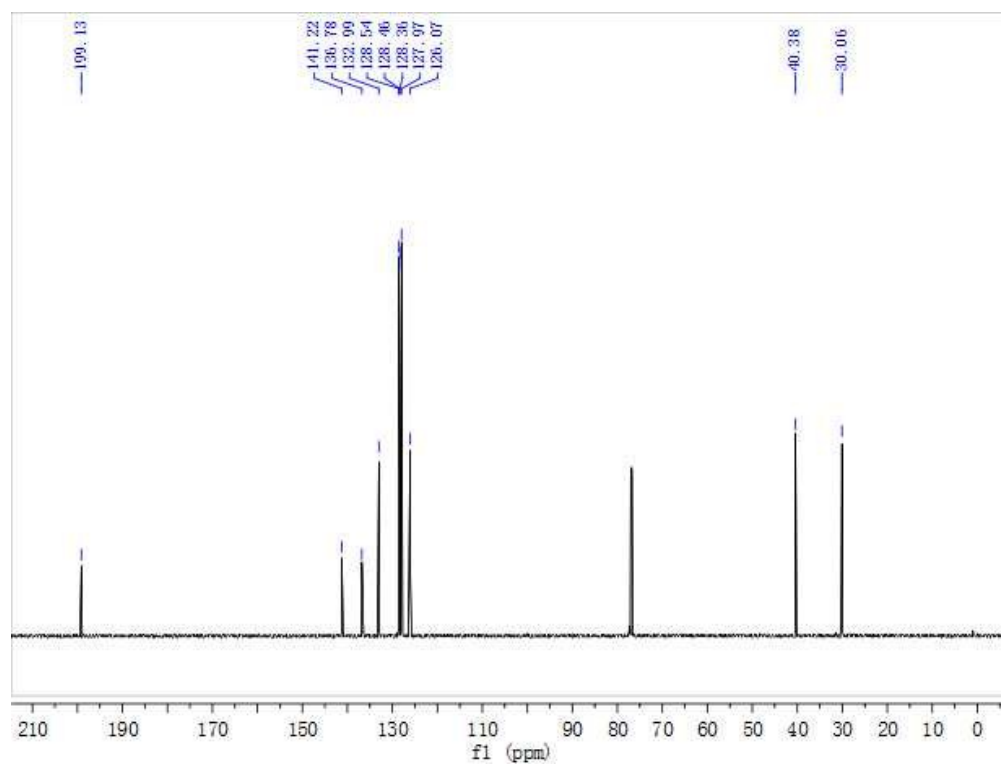

**3-(4-fluorophenyl)-1-phenylpropan-1-one (CAS: 41865-46-7 )<sup>1</sup>**

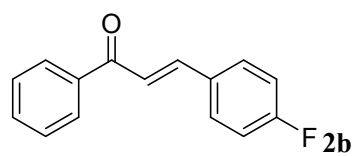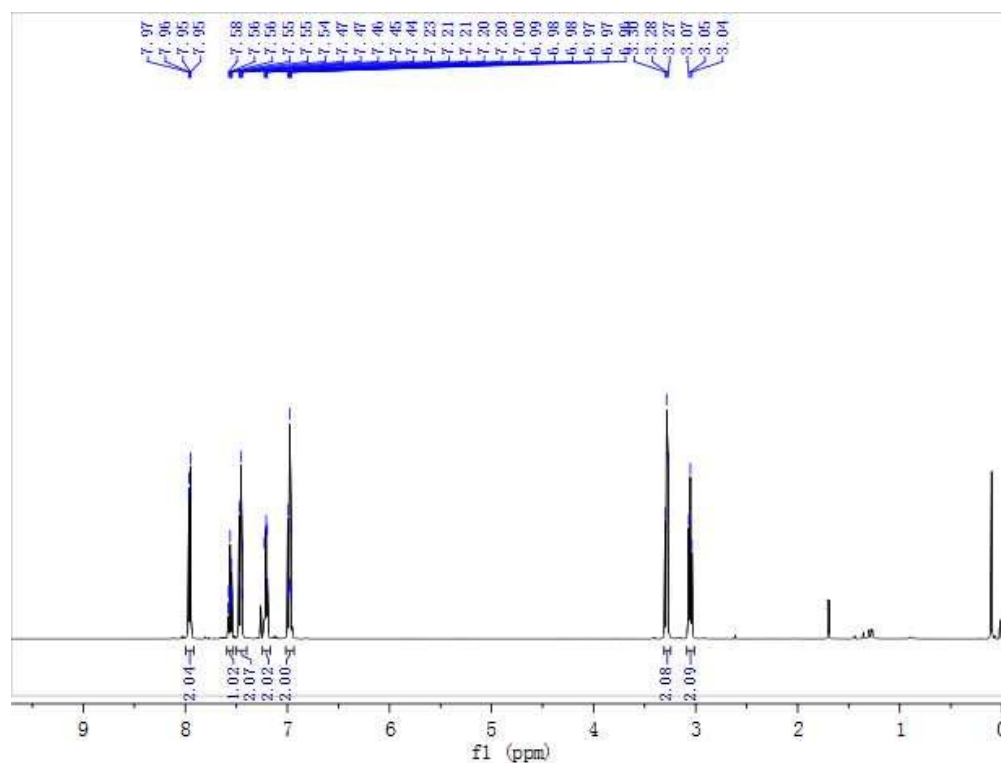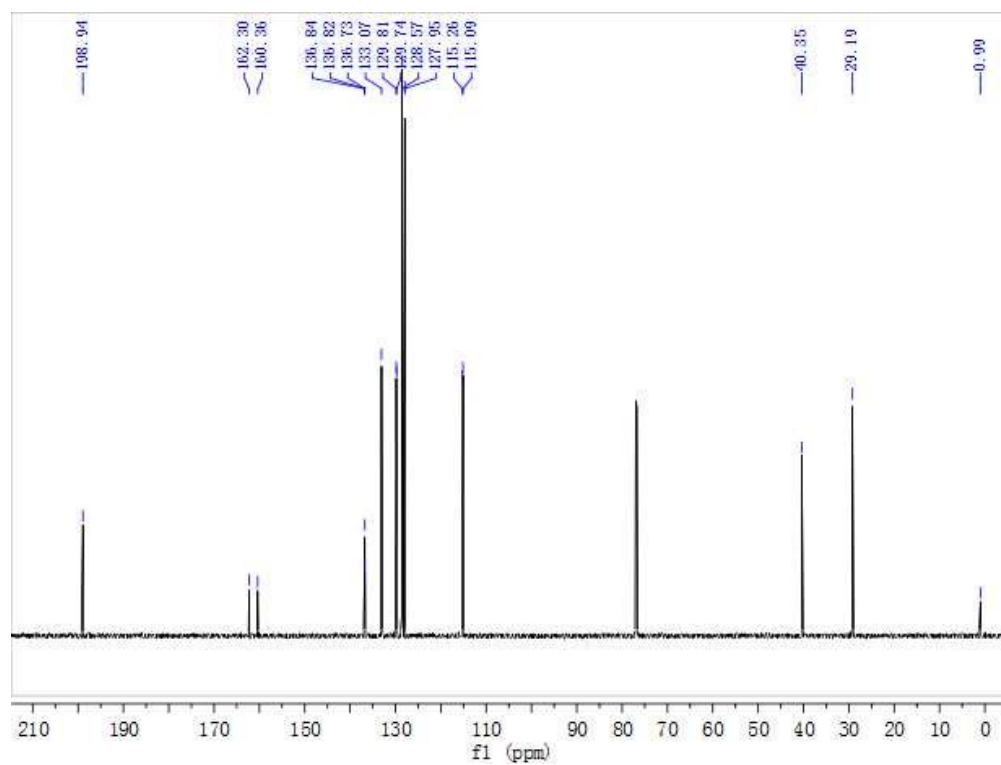

**1-(4-fluorophenyl)-3-phenylpropan-1-one (CAS: 41938-64-1)<sup>1</sup>**



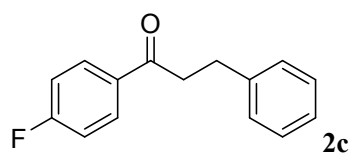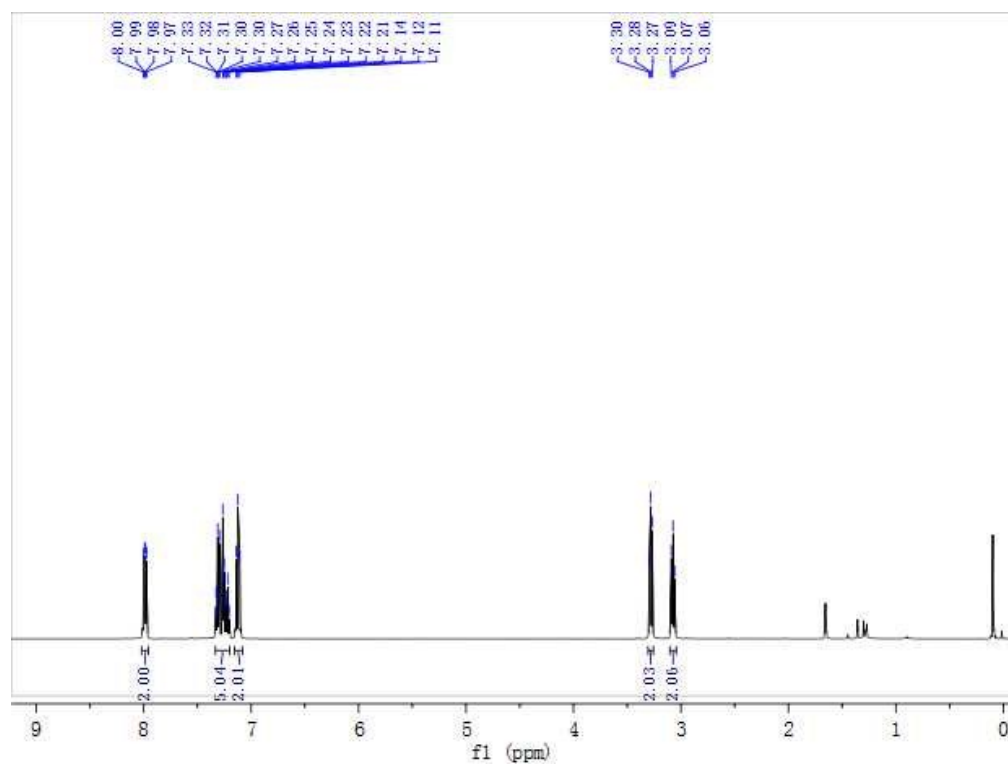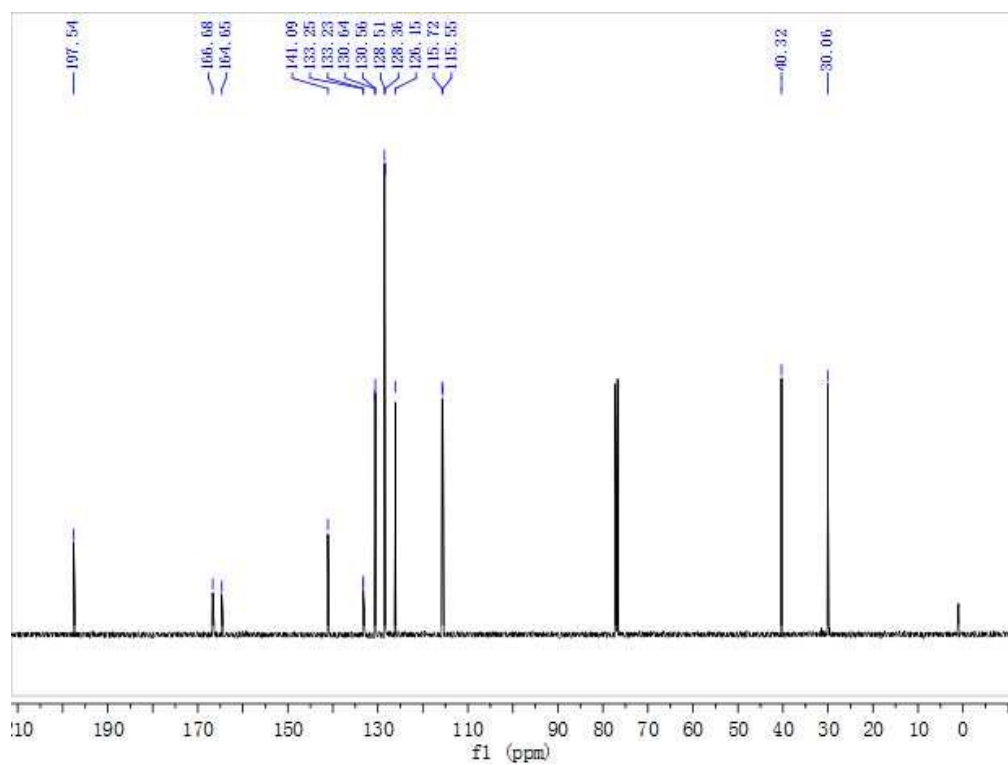

**1,3-bis(4-fluorophenyl)propan-1-one (CAS: 104147-29-7)<sup>2</sup>**

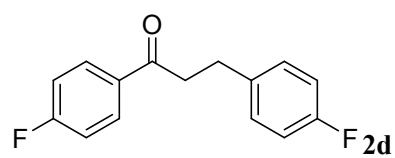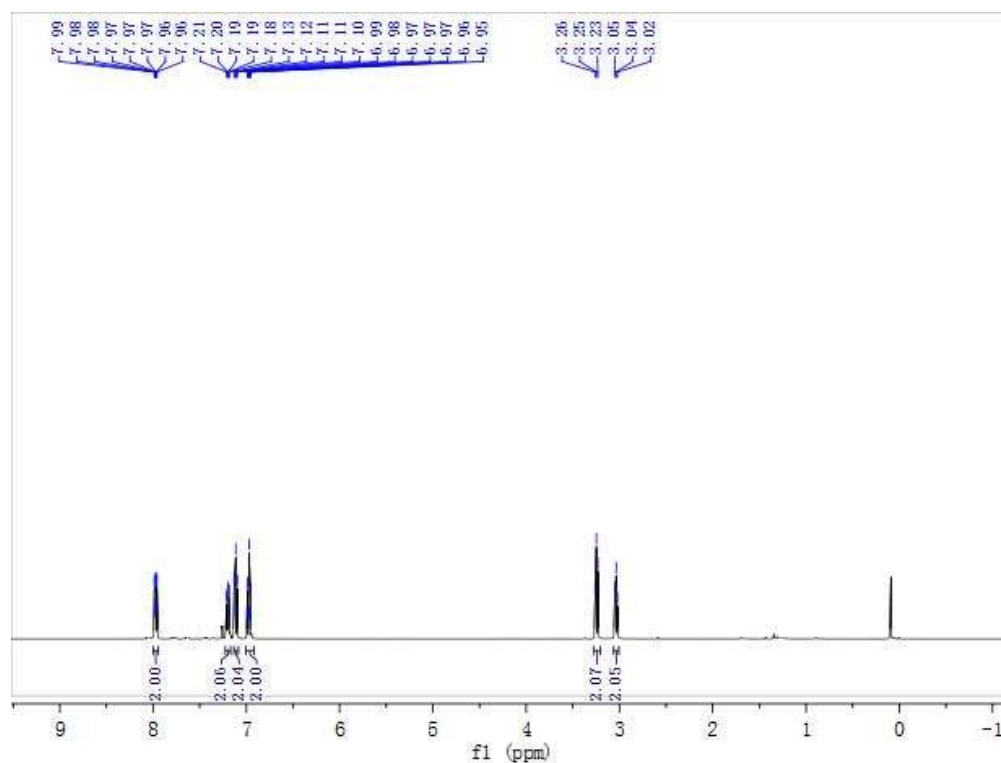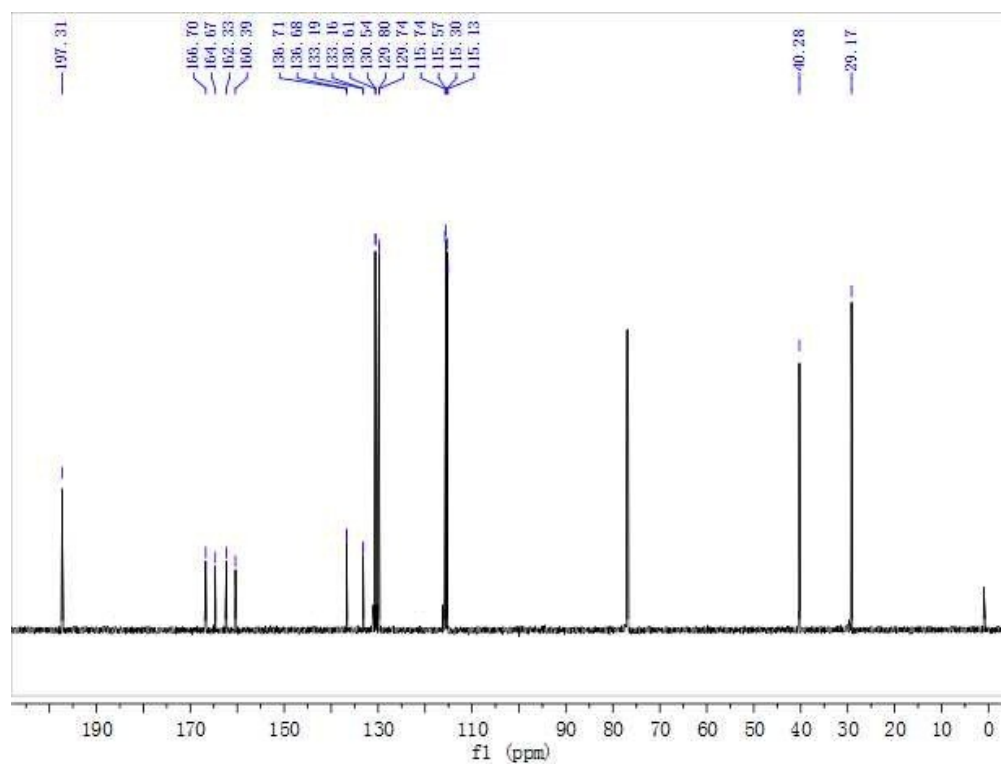

**3-(4-fluorophenyl)-1-(p-tolyl)propan-1-one (CAS: 898767-89-0)<sup>3</sup>**

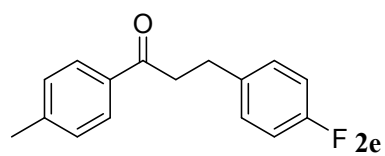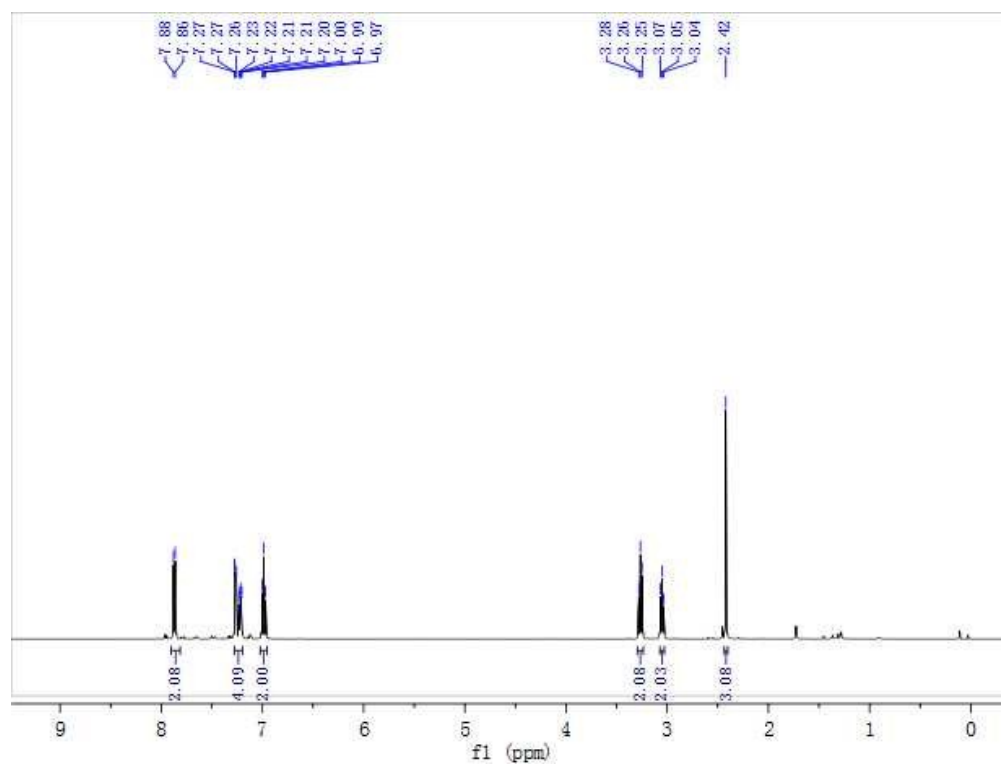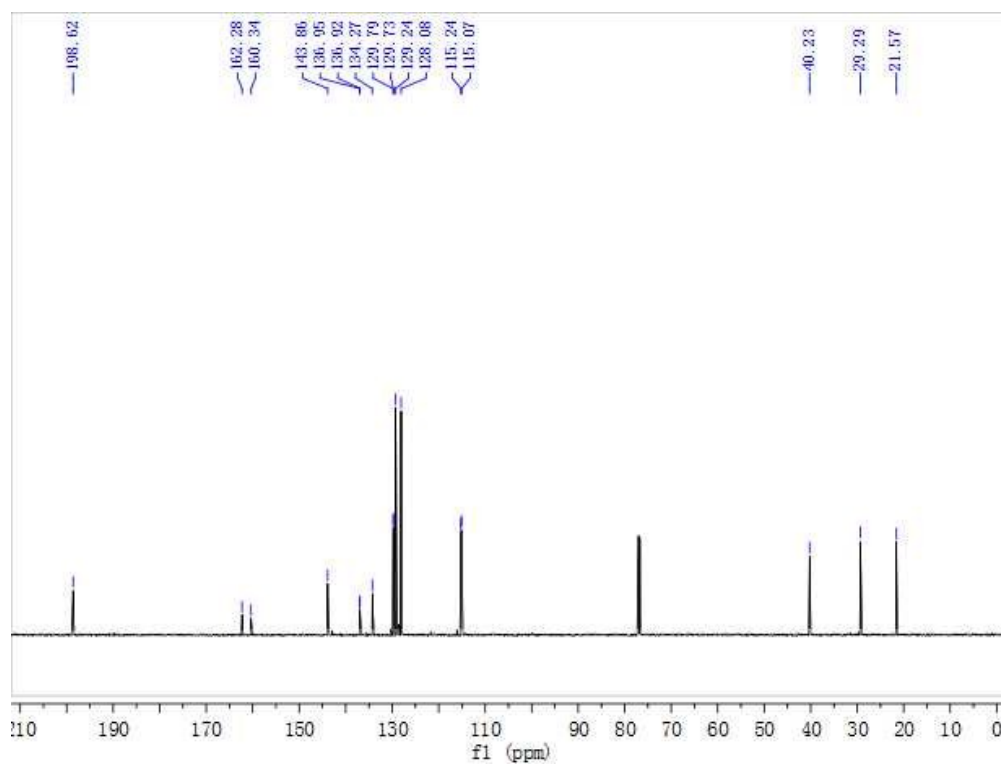

1-(4-chlorophenyl)-3-phenylpropan-1-one (CAS: 5739-37-7)<sup>1</sup>

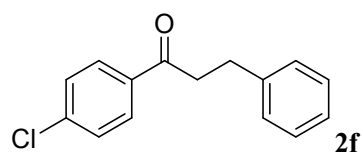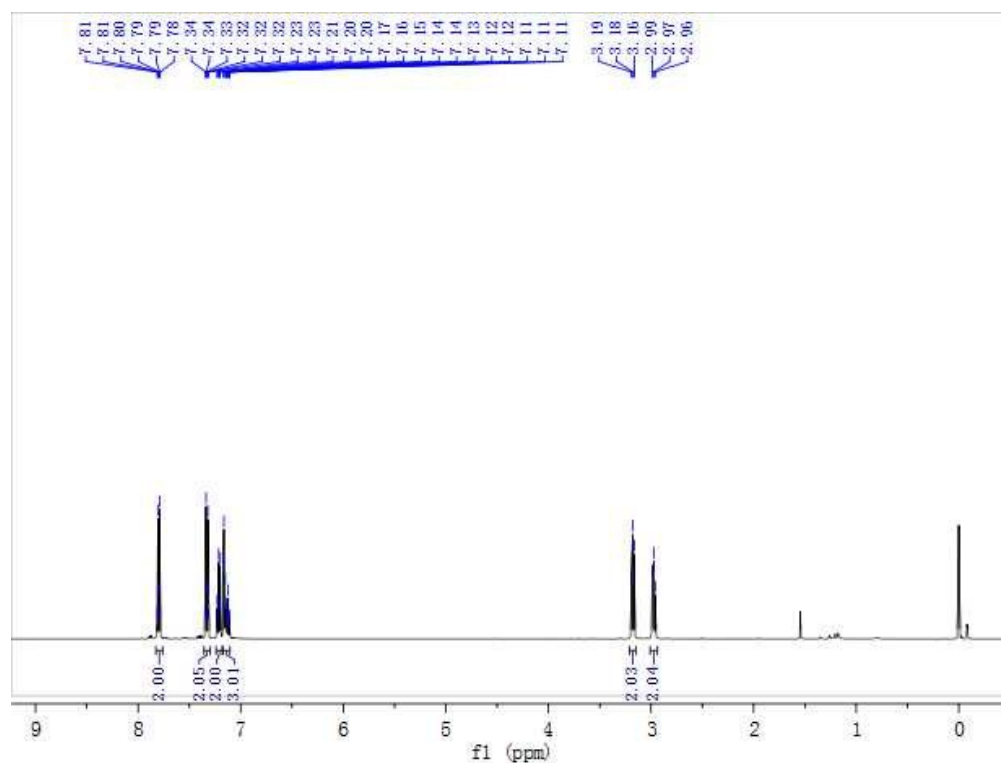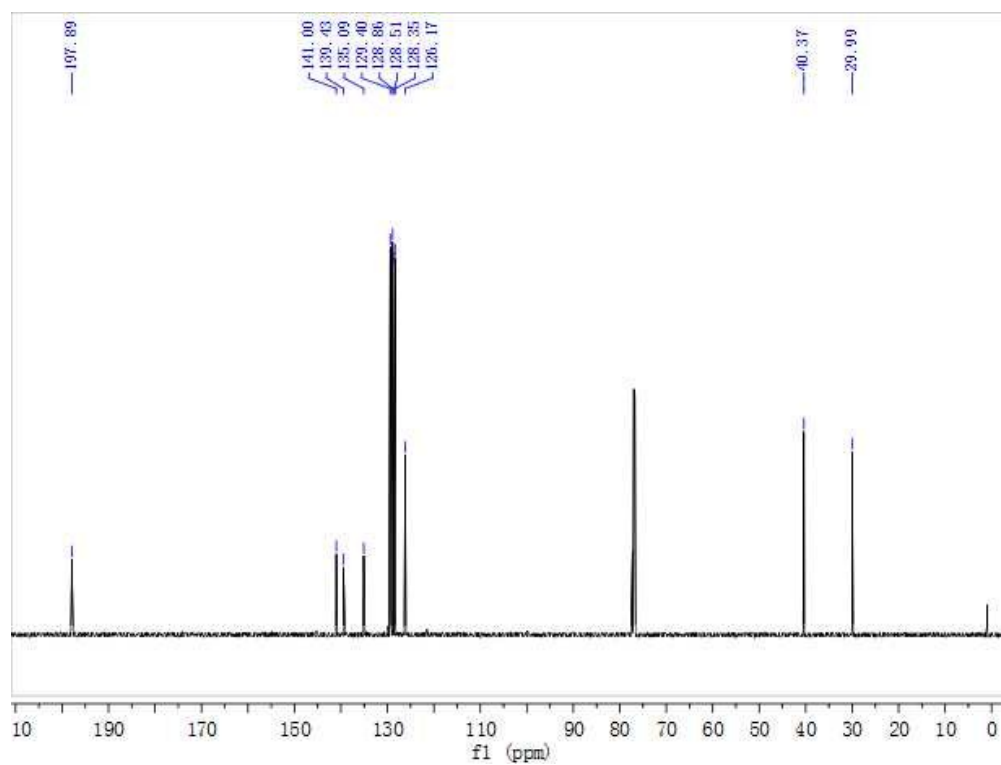

**3-(4-chlorophenyl)-1-phenylpropan-1-one (CAS: 5739-39-9)<sup>1</sup>**

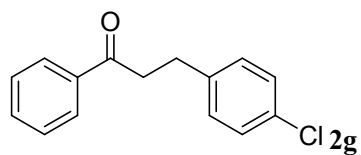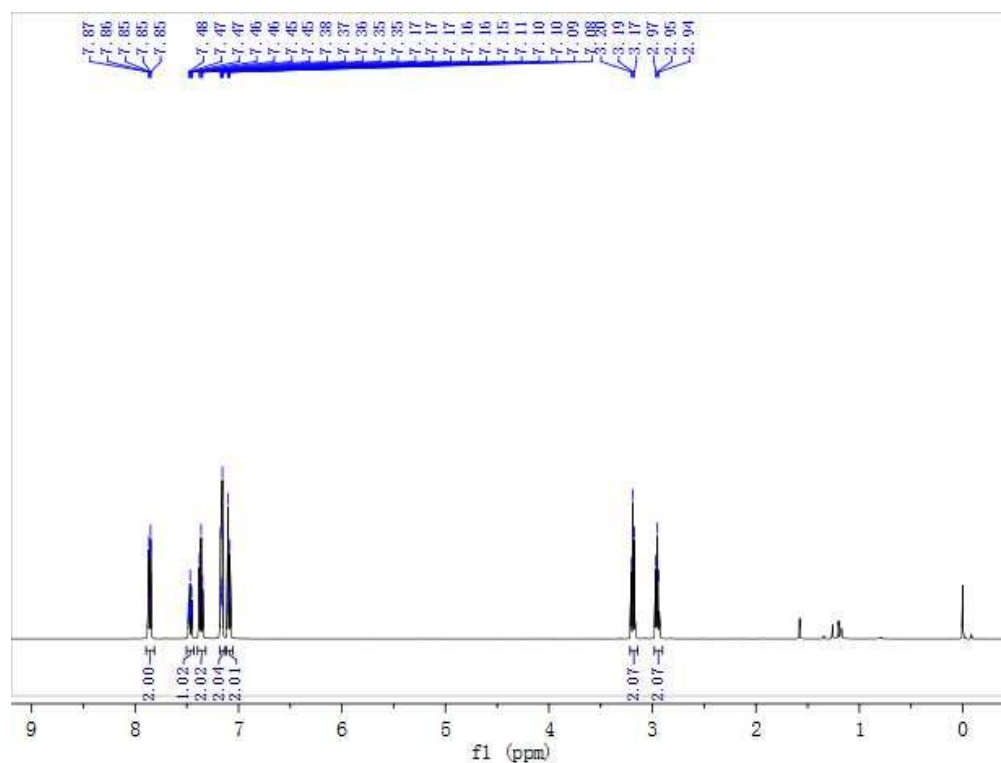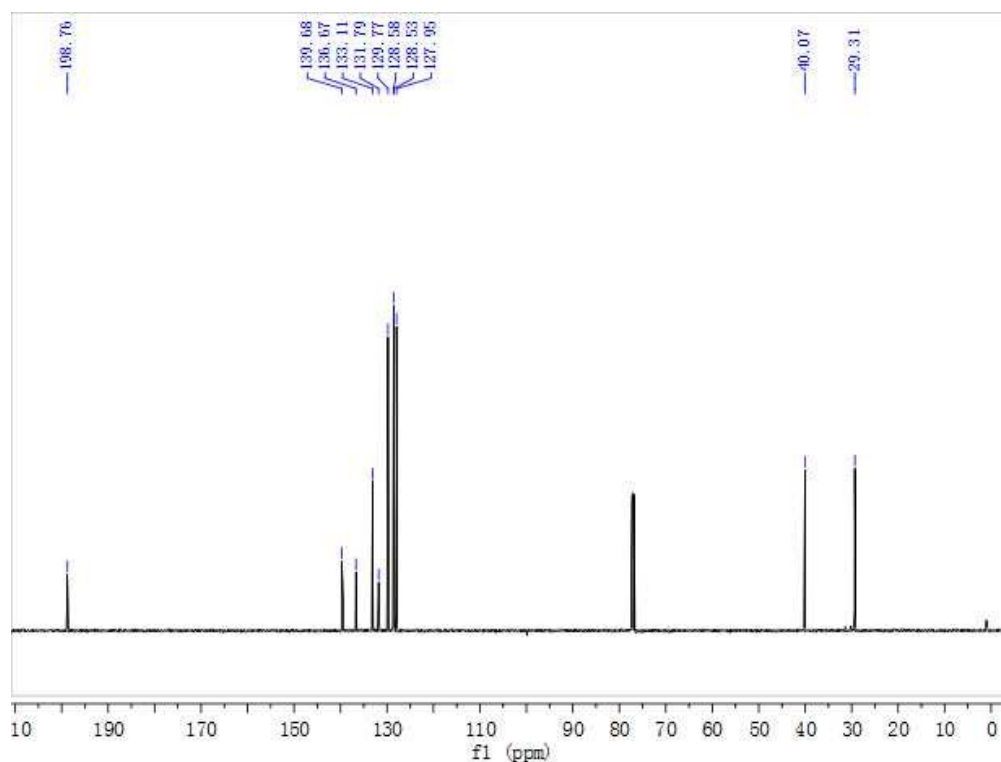

**3-(4-methoxyphenyl)-1-phenylpropan-1-one (CAS: 1669-49-4)<sup>1</sup>**

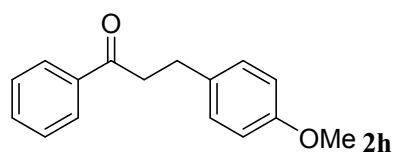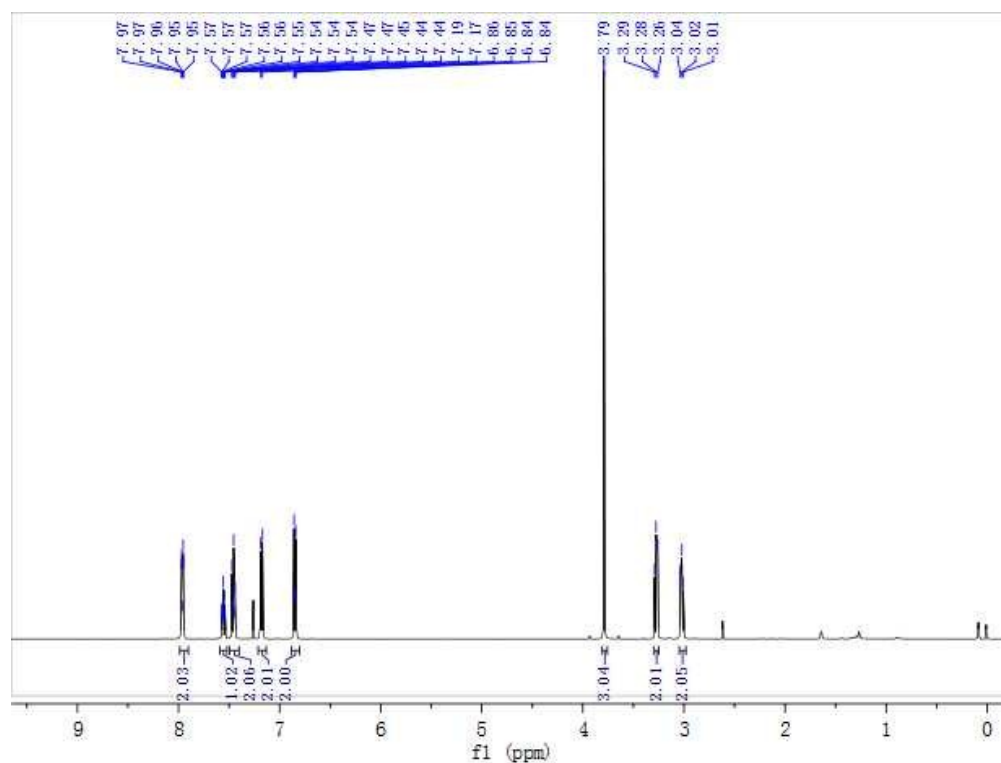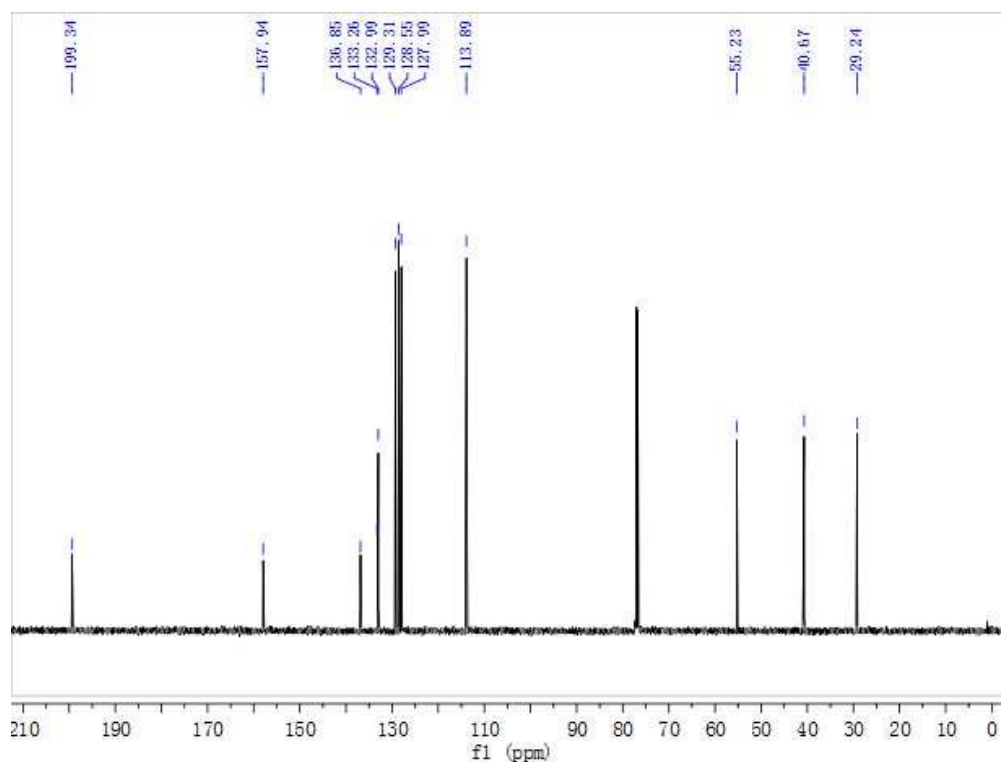

1-(4-methoxyphenyl)-3-phenylpropan-1-one (CAS: 5739-38-8)<sup>1</sup>

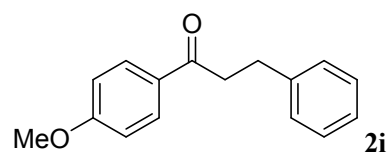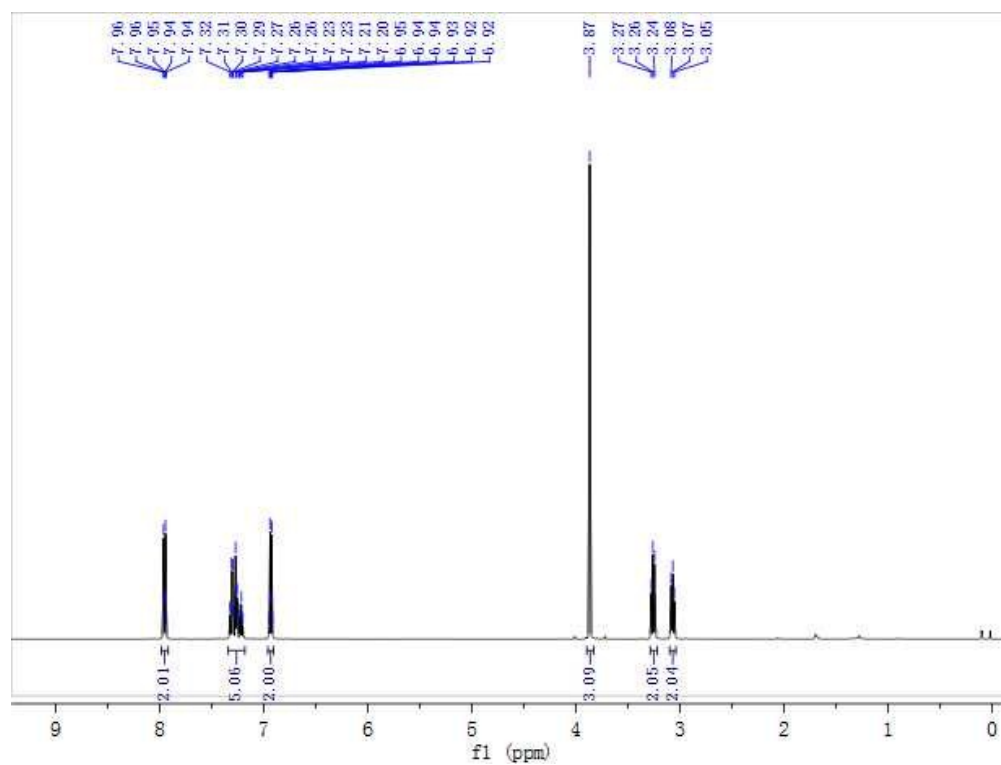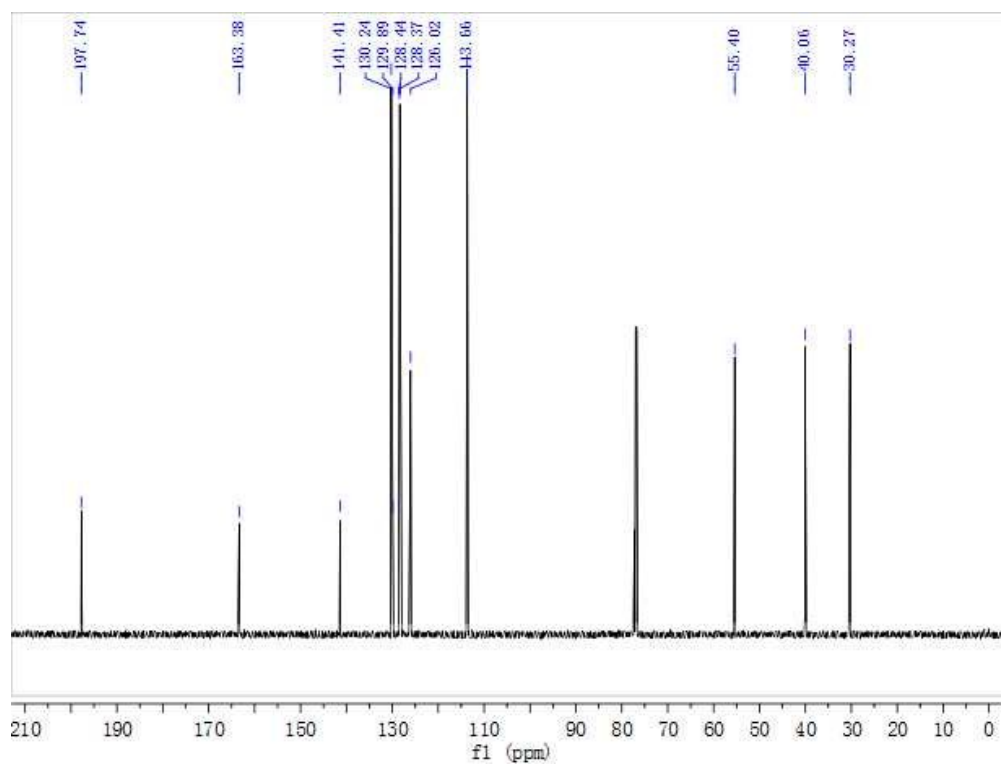

**3-(3,4-dimethoxyphenyl)-1-phenylpropan-1-one (CAS: 7468-58-8)<sup>4</sup>**

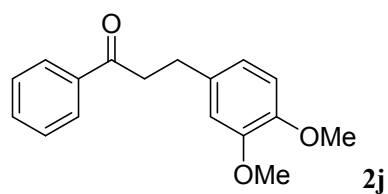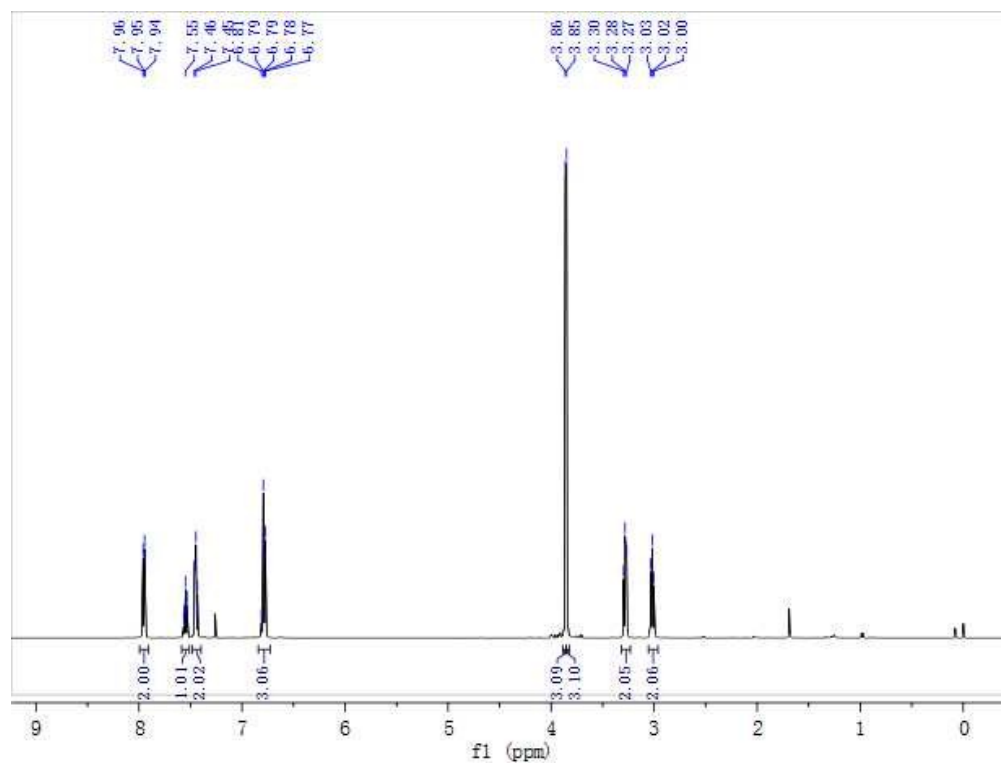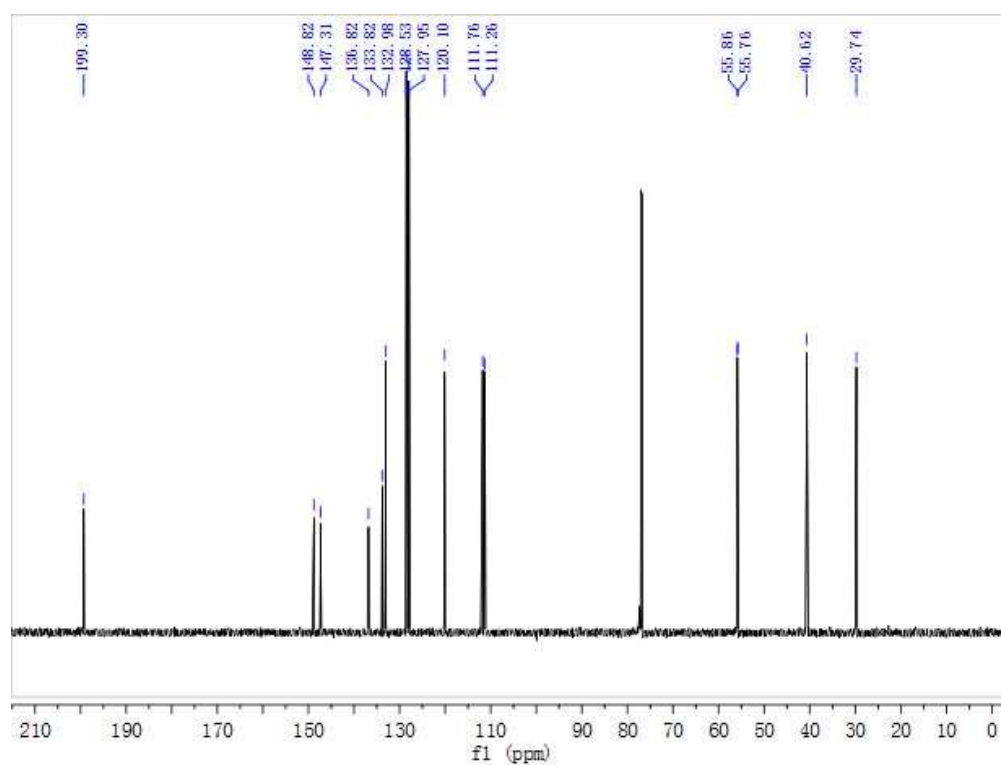

1-(4-hydroxyphenyl)-3-phenylpropan-1-one (CAS: 36941-00-1)<sup>5</sup>



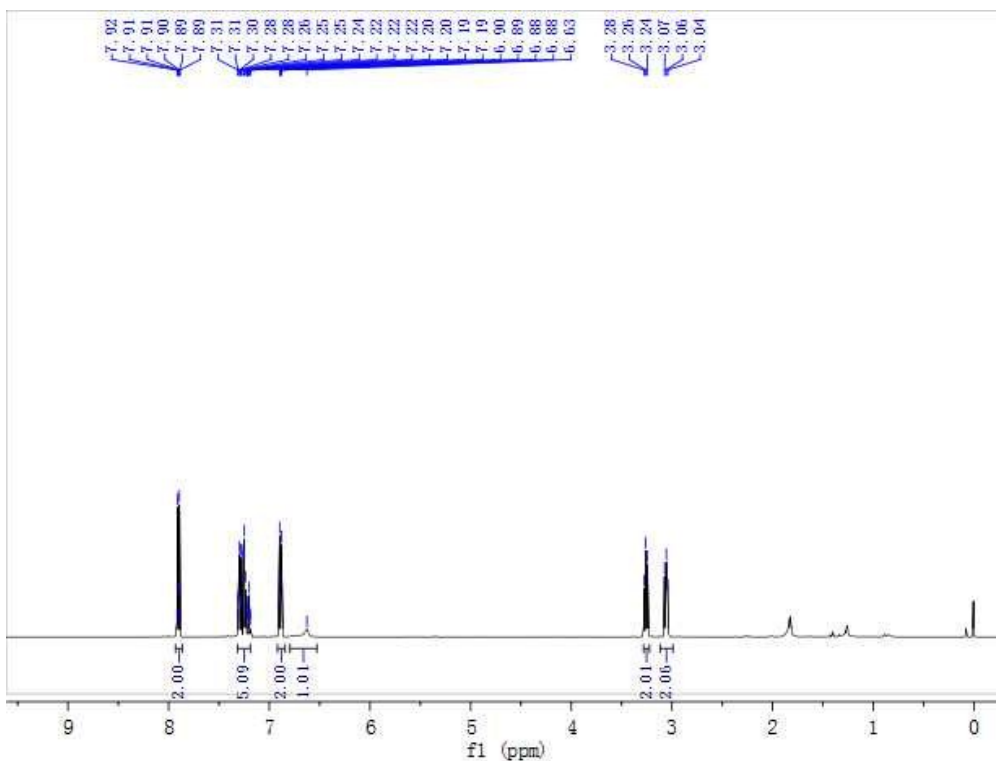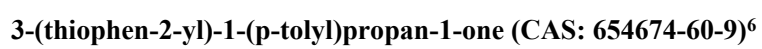

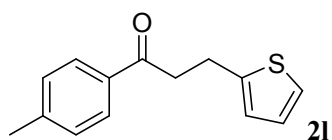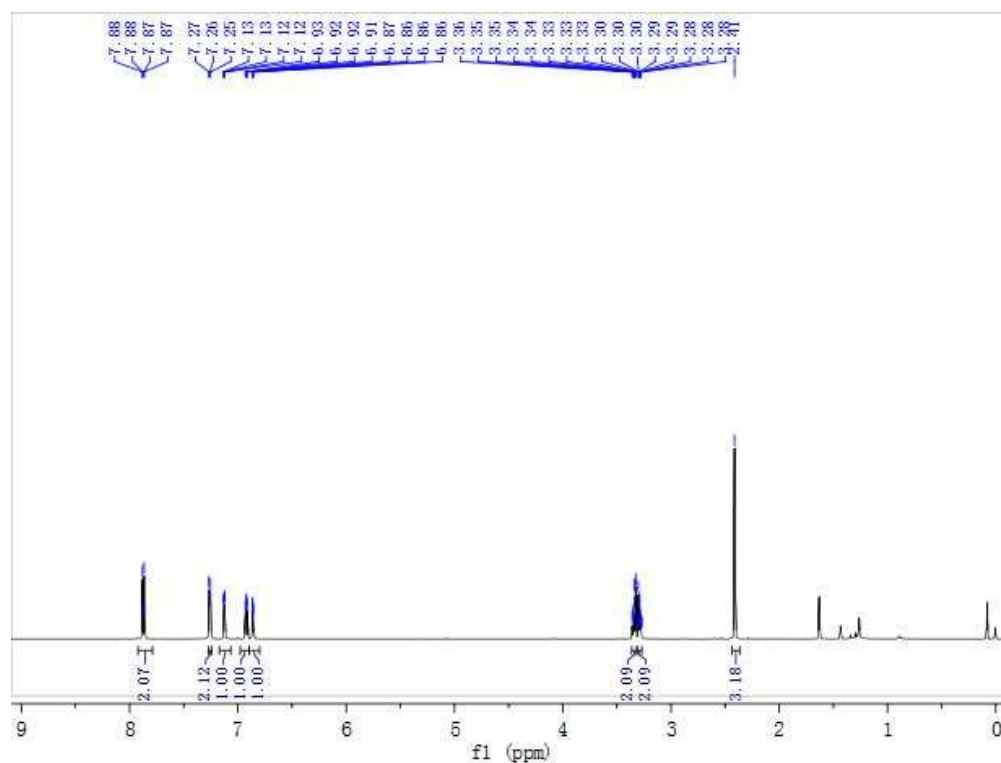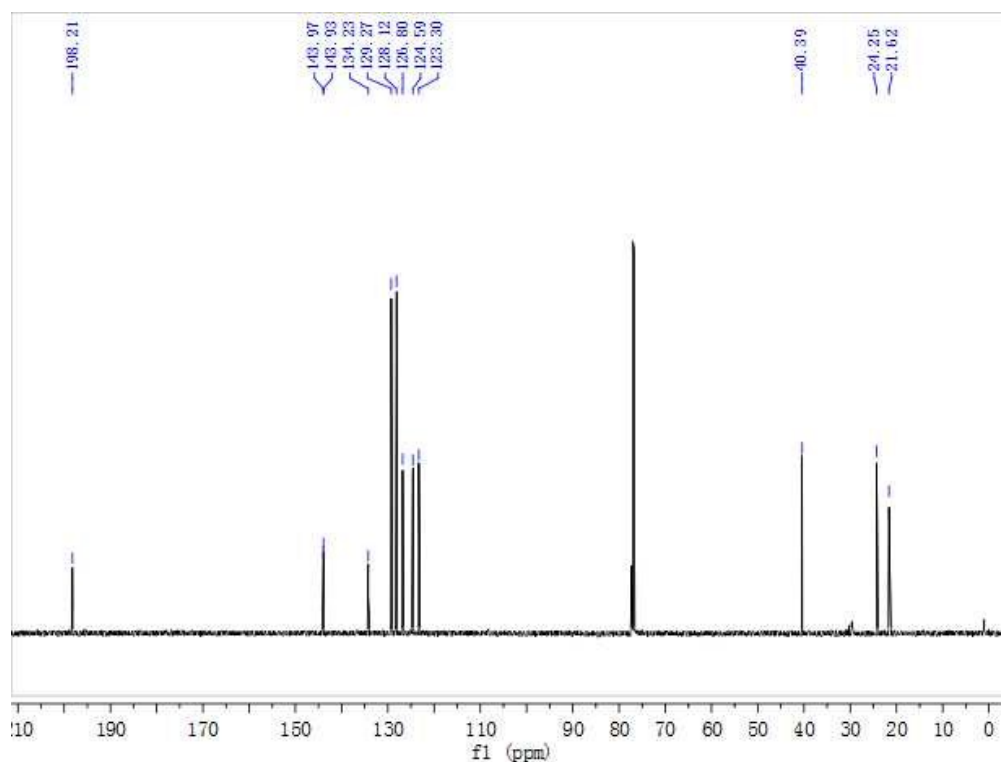

**2-benzyl-3,4-dihydronaphthalen-1(2H)-one (CAS: 27019-08-5)<sup>7</sup>**

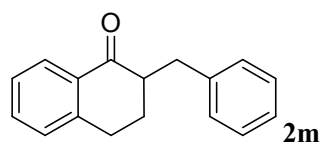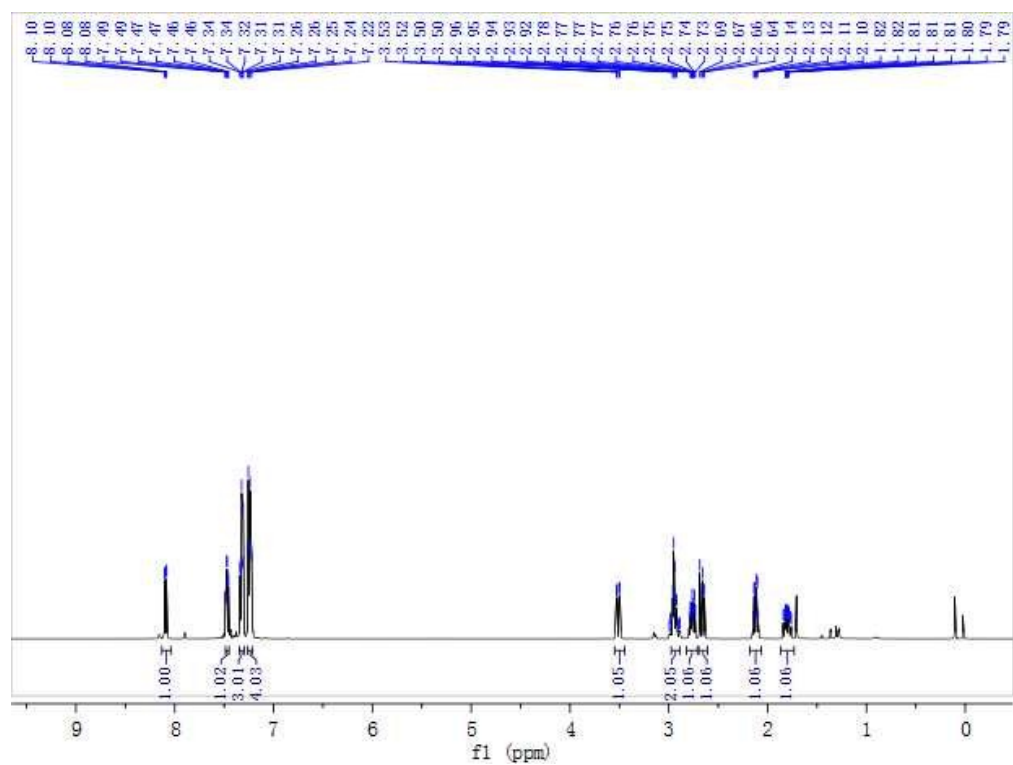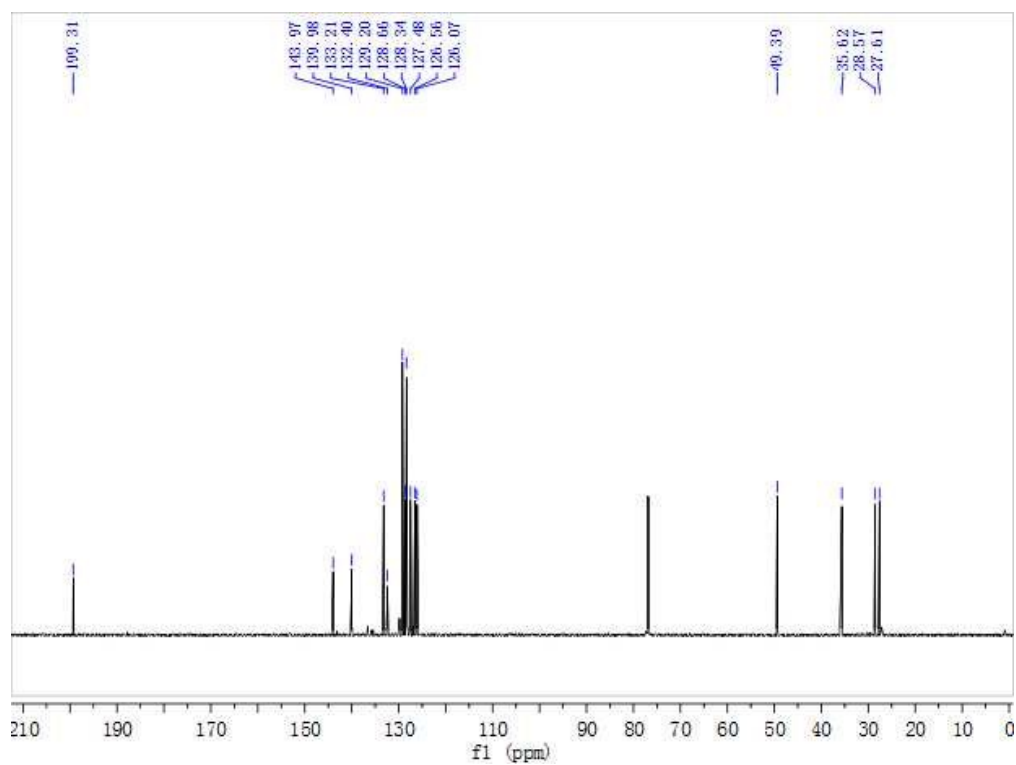

**ethyl 4-oxo-4-phenylbutanoate (CAS: 6270-17-3)<sup>9</sup>**

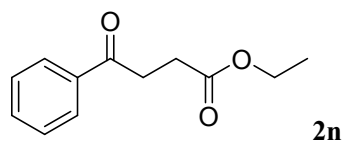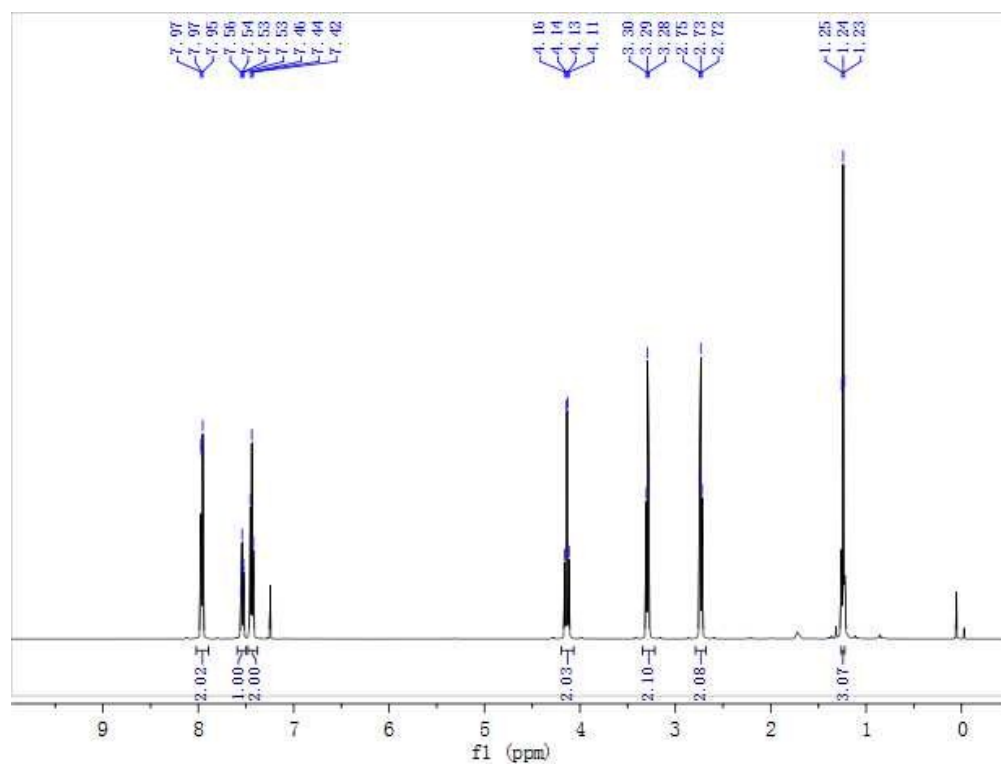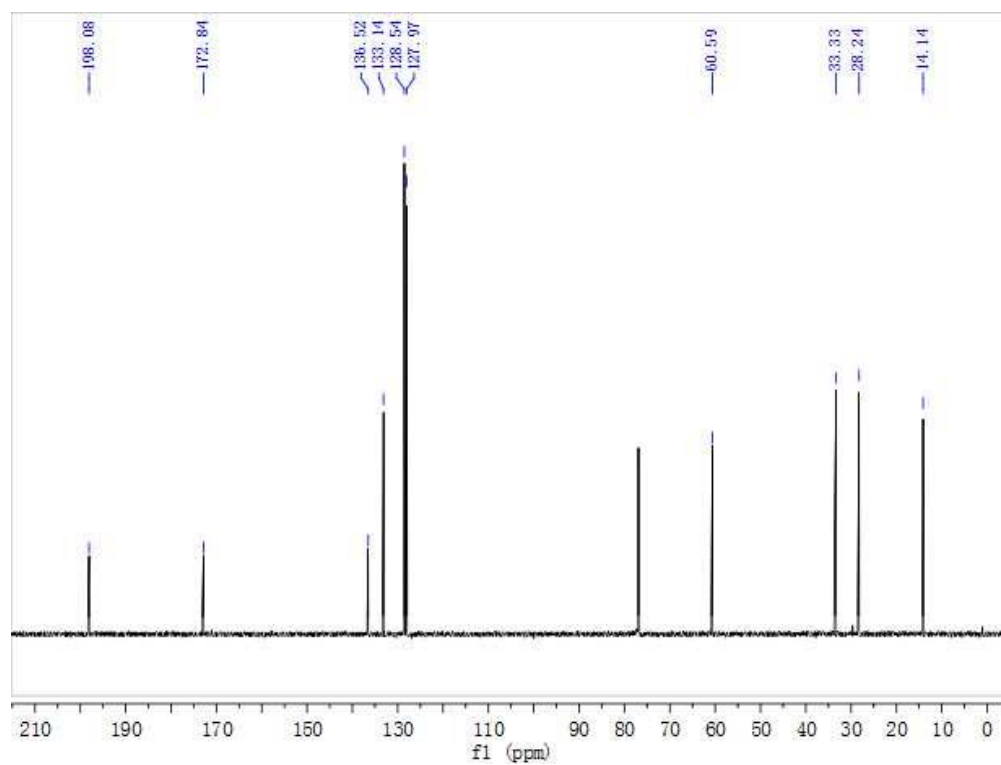

**4-phenylbutan-2-one (CAS: 2550-26-7)<sup>2</sup>**

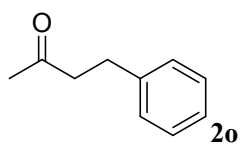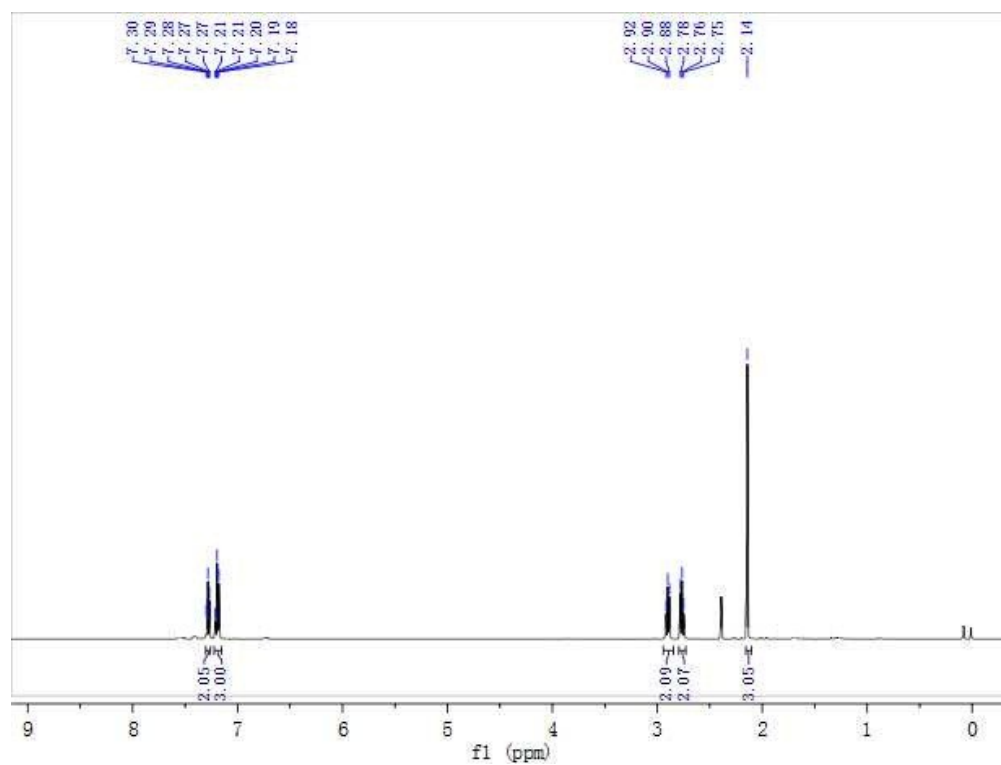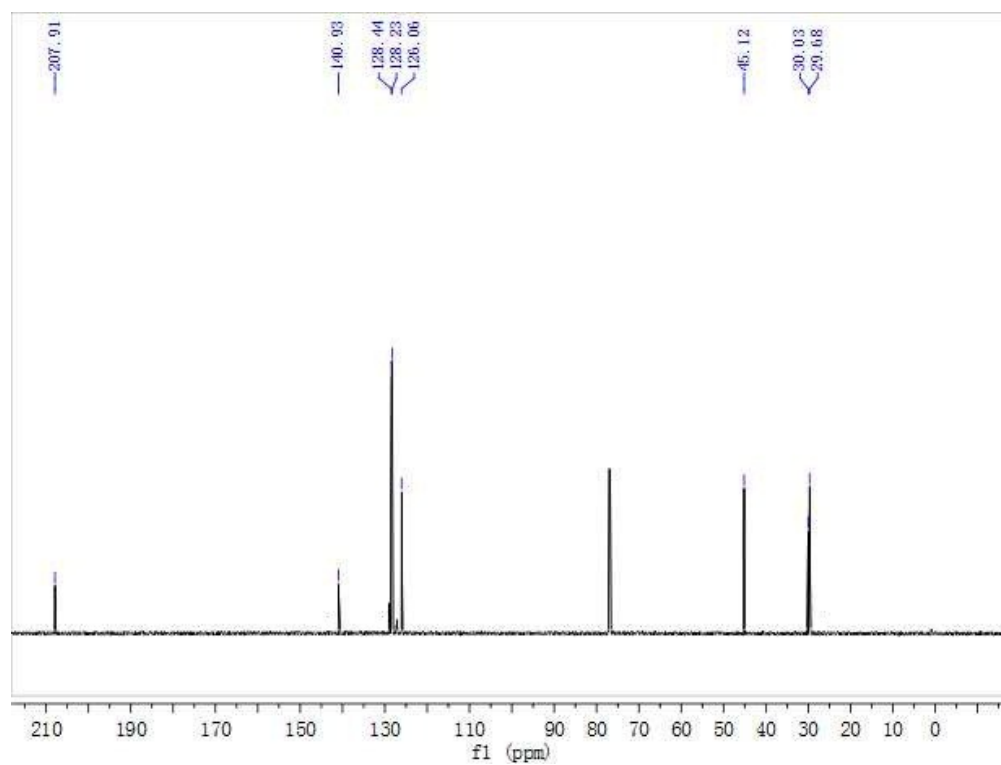

**1,5-diphenylpentan-3-one (CAS: 5396-91-8)<sup>10</sup>**

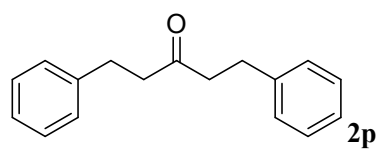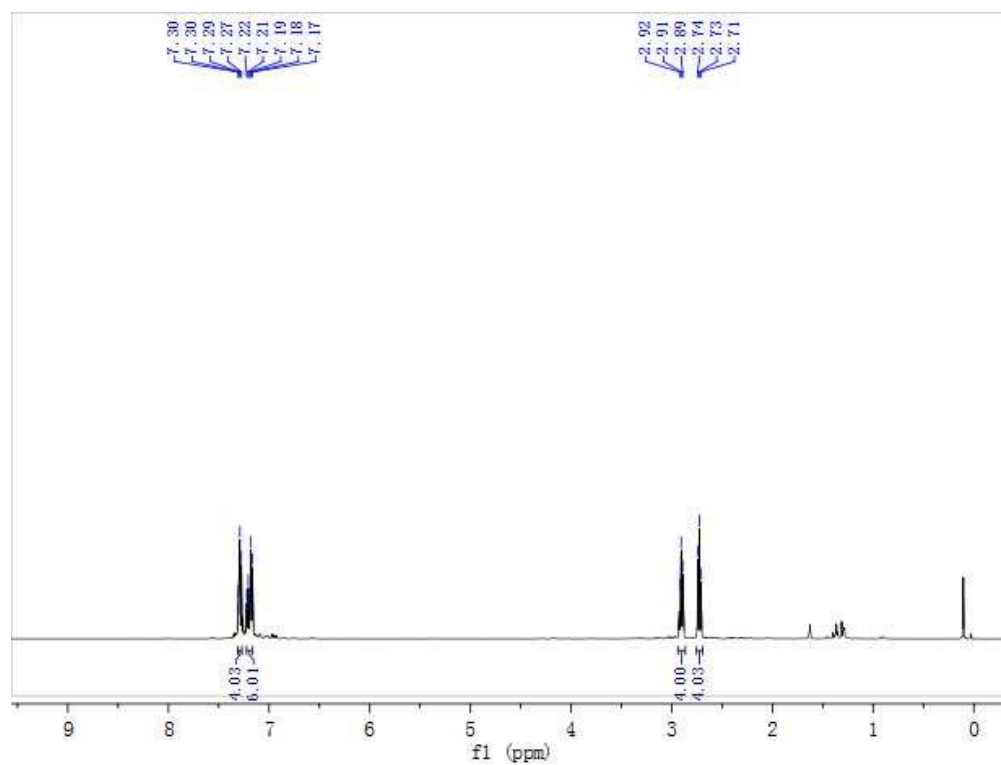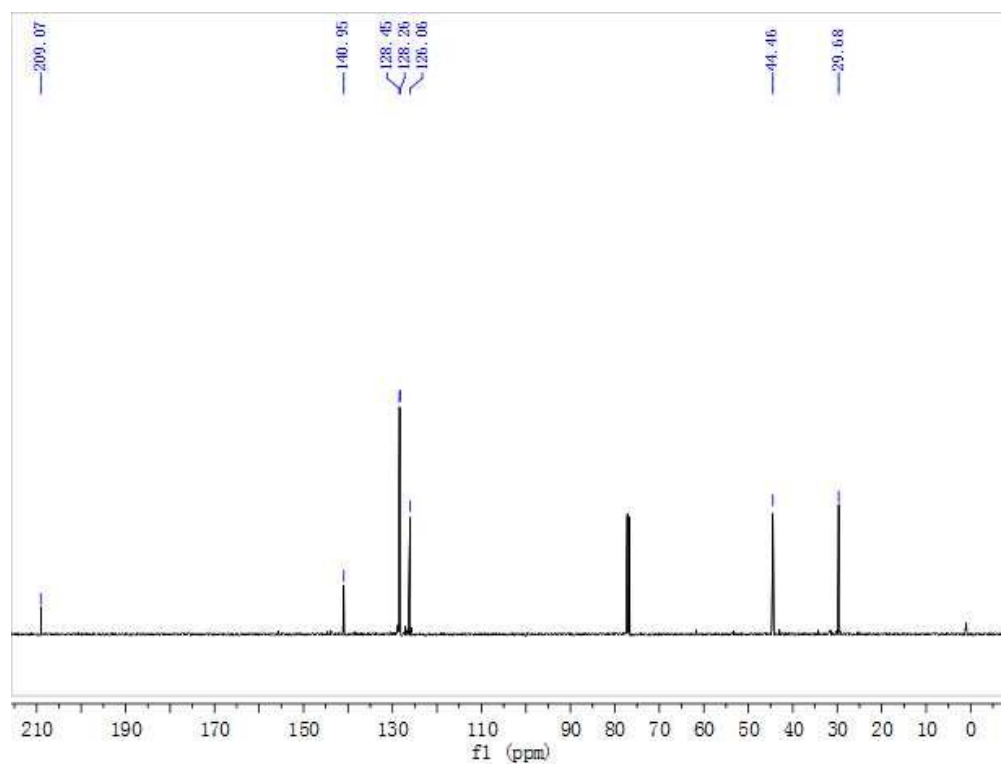

1,4-diphenylbutane-1,4-dione (CAS: 495-71-6)<sup>8</sup>

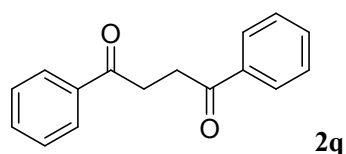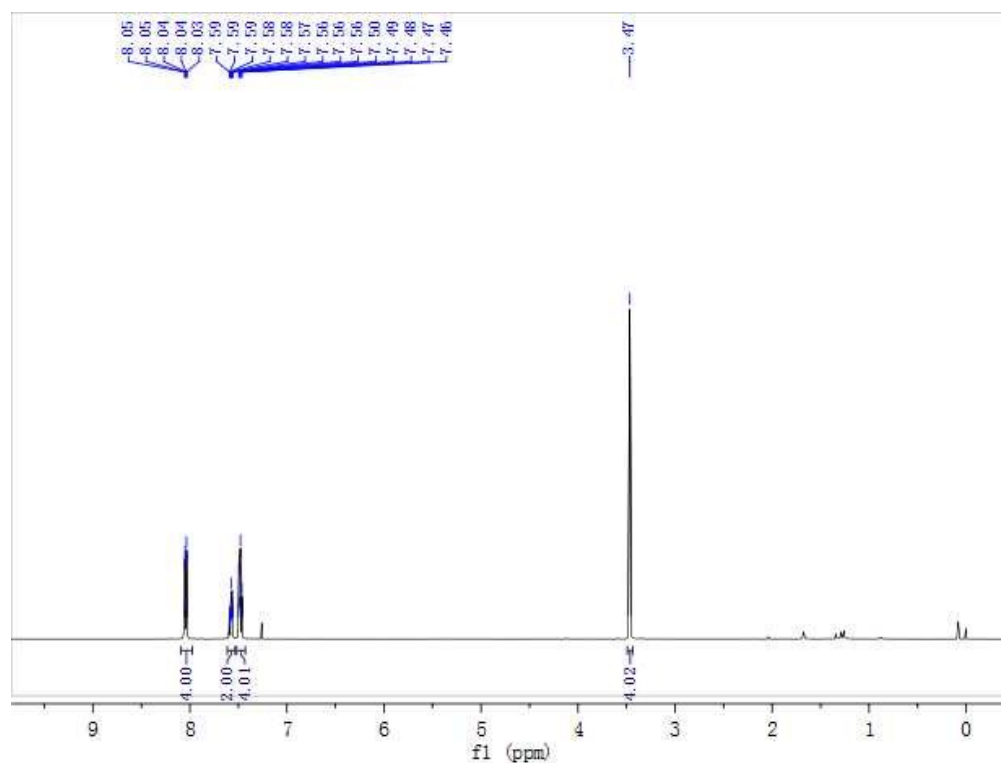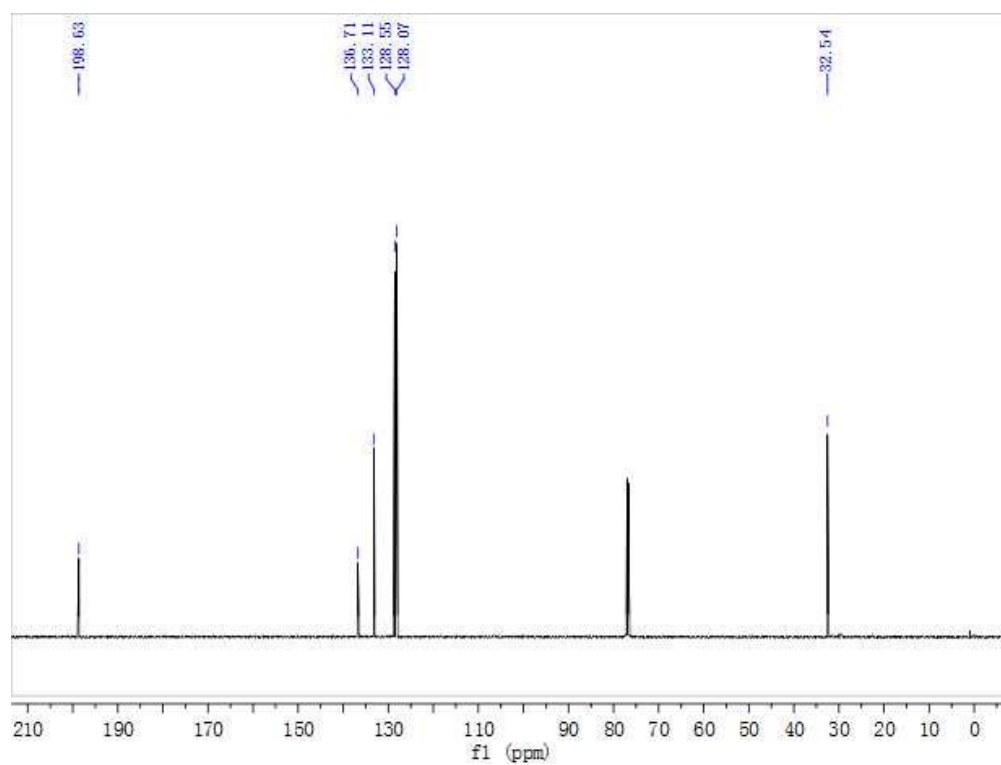

**(E)-3-phenyl-1-(4-(phenylethynyl)phenyl)prop-2-en-1-one (new compound)**

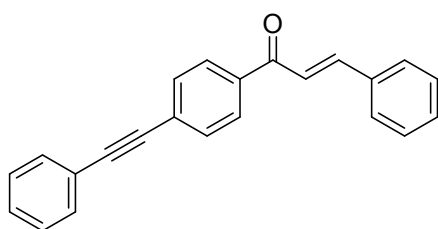

**1s**

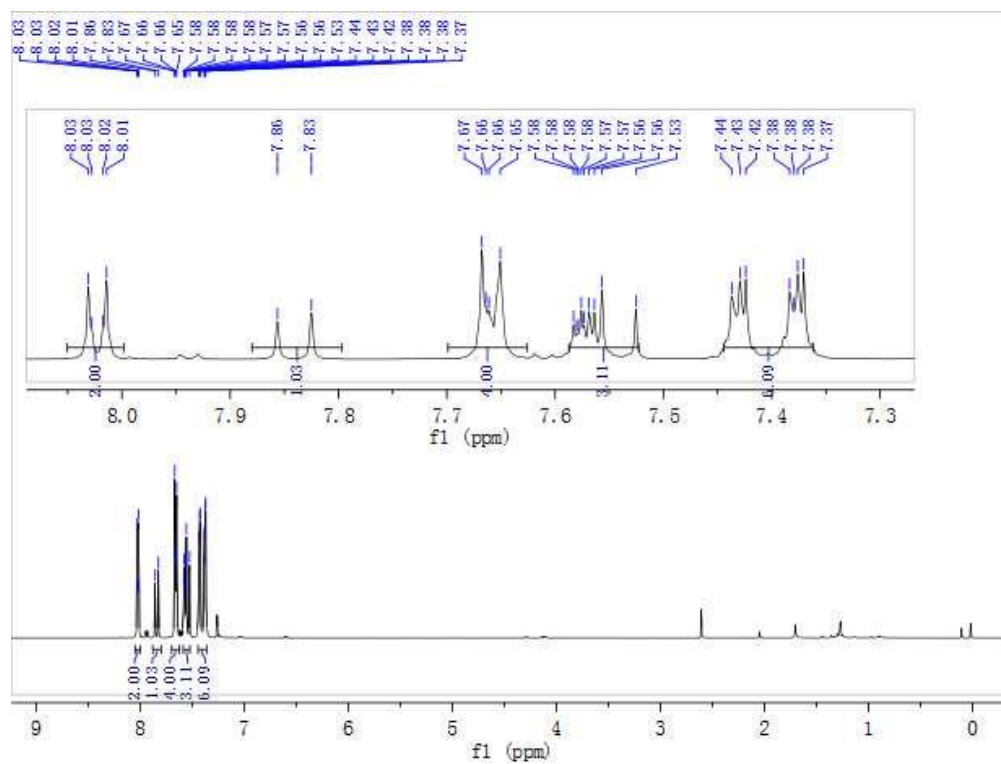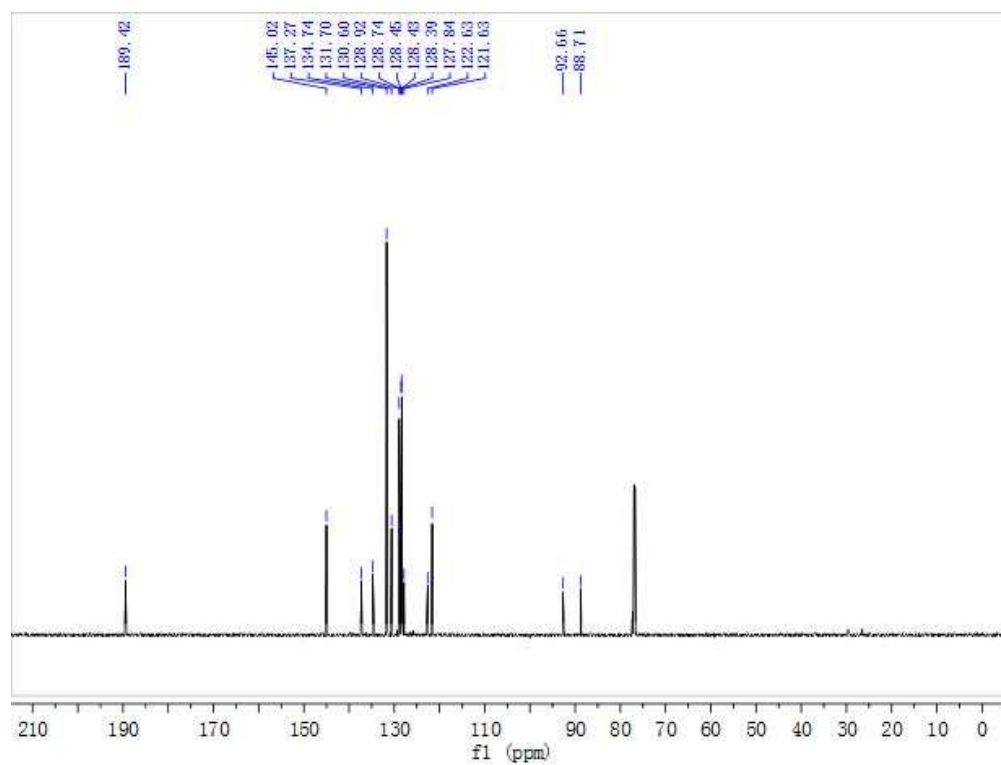



Chemical structure of 1-phenyl-4-(3-oxo-3-phenylpropyl)benzene, showing a biphenyl system with a propyl ketone chain.

Chemical structure of compound 10: O=C1C(=O)N(C1)C2=CC=CC=C2

<sup>1</sup>H NMR spectrum (CDCl<sub>3</sub>) showing peaks from 7.95 to 7.22 ppm. Integration values are provided for each peak group.

<sup>13</sup>C NMR spectrum (CDCl<sub>3</sub>) showing peaks from 198.40 to 30.08 ppm.

<sup>1</sup>H NMR spectrum (DMSO-d<sub>6</sub>) showing peaks from 11 to 0 ppm. Integration values are provided for each peak group.

**(E)-1-phenyl-3-(4-vinylphenyl)prop-2-en-1-one (CAS: 52506-31-7)**

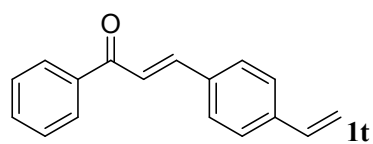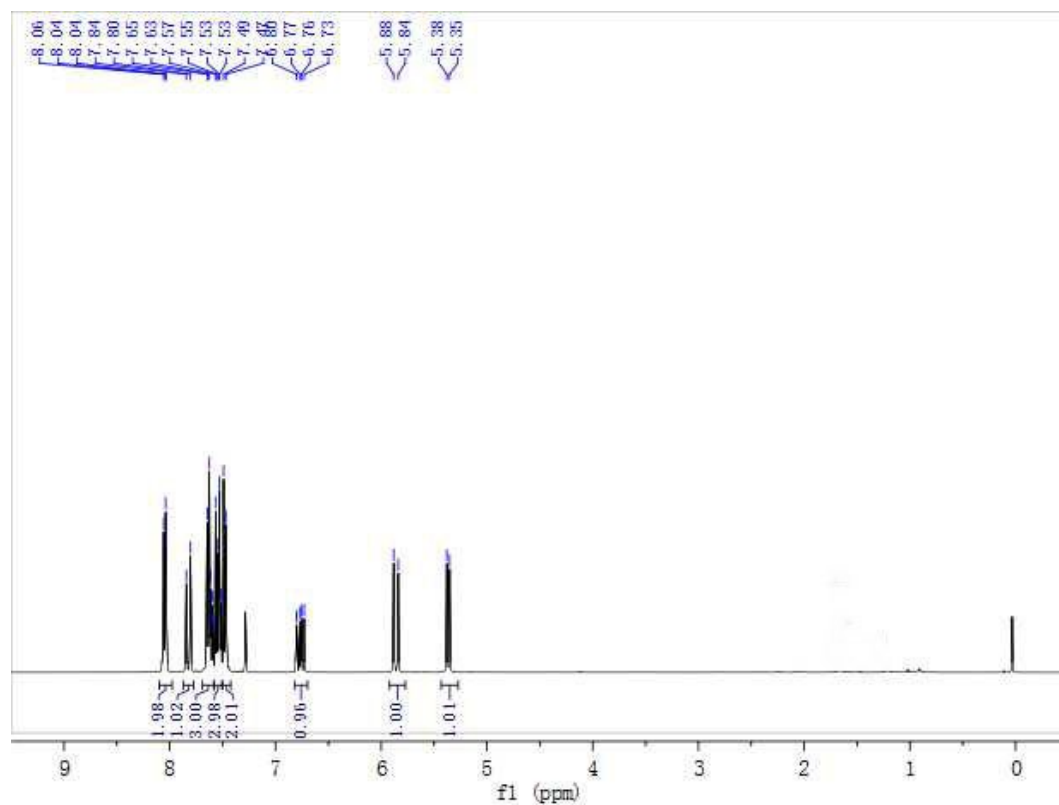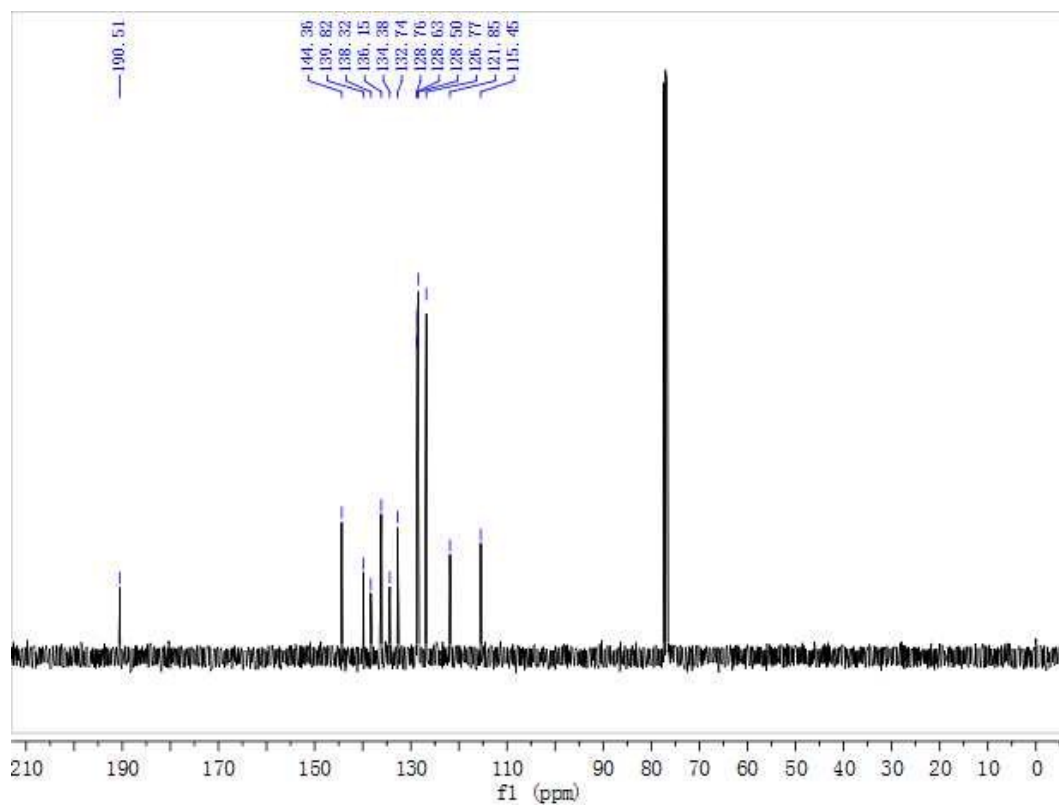

1-phenyl-3-(4-vinylphenyl)propan-1-one (CAS: 93318-87-7)

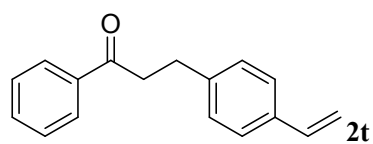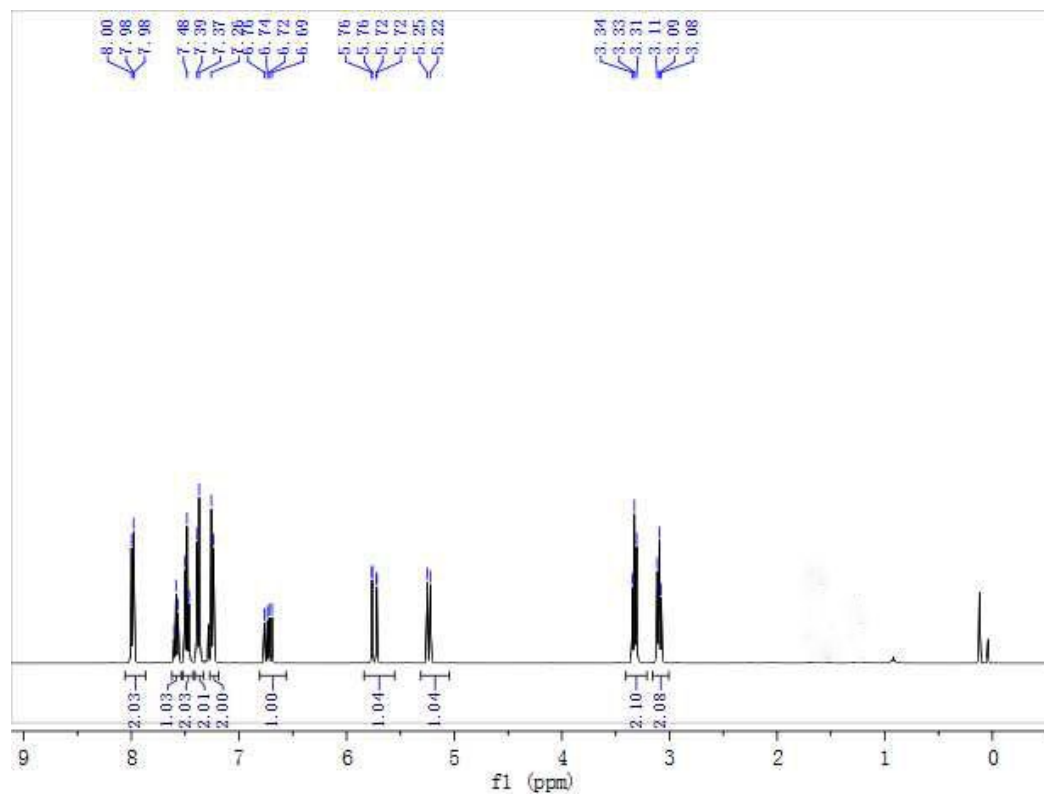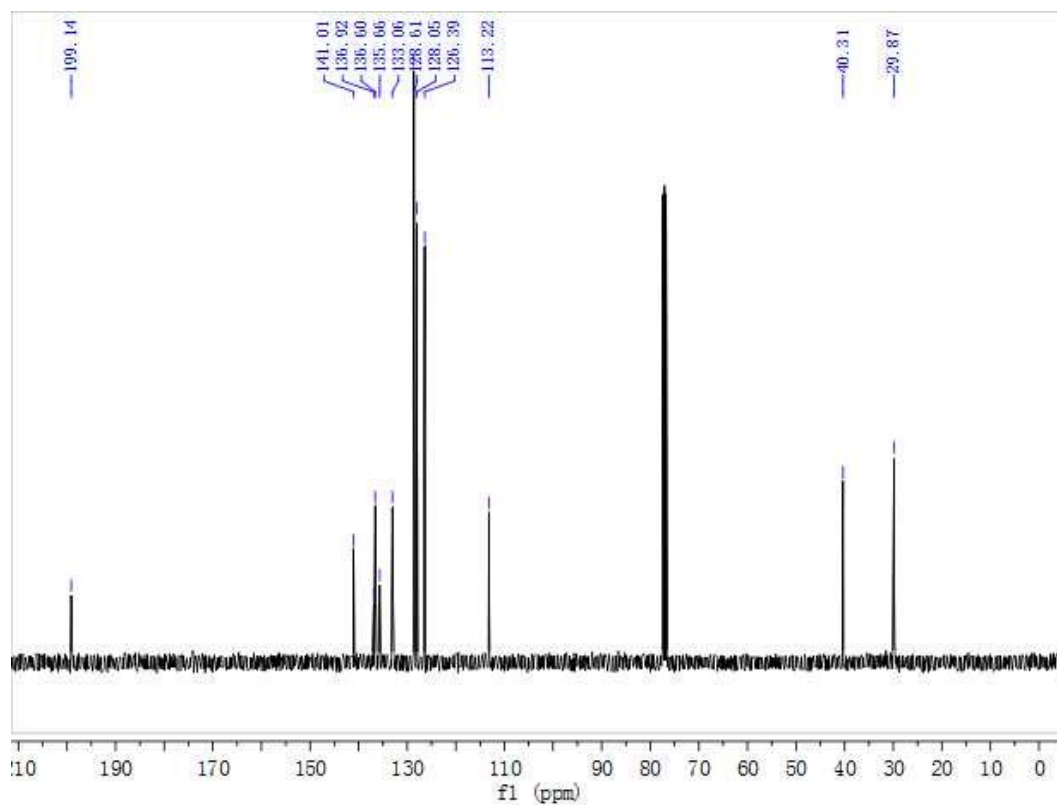

**1,3-diphenyl-3-(4,4,5,5-tetramethyl-1,3,2-dioxaborolan-2-yl)propan-1-one (CAS: 199999-46-7)<sup>12</sup>**

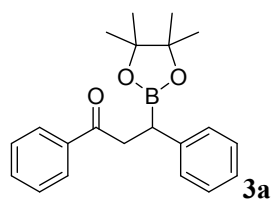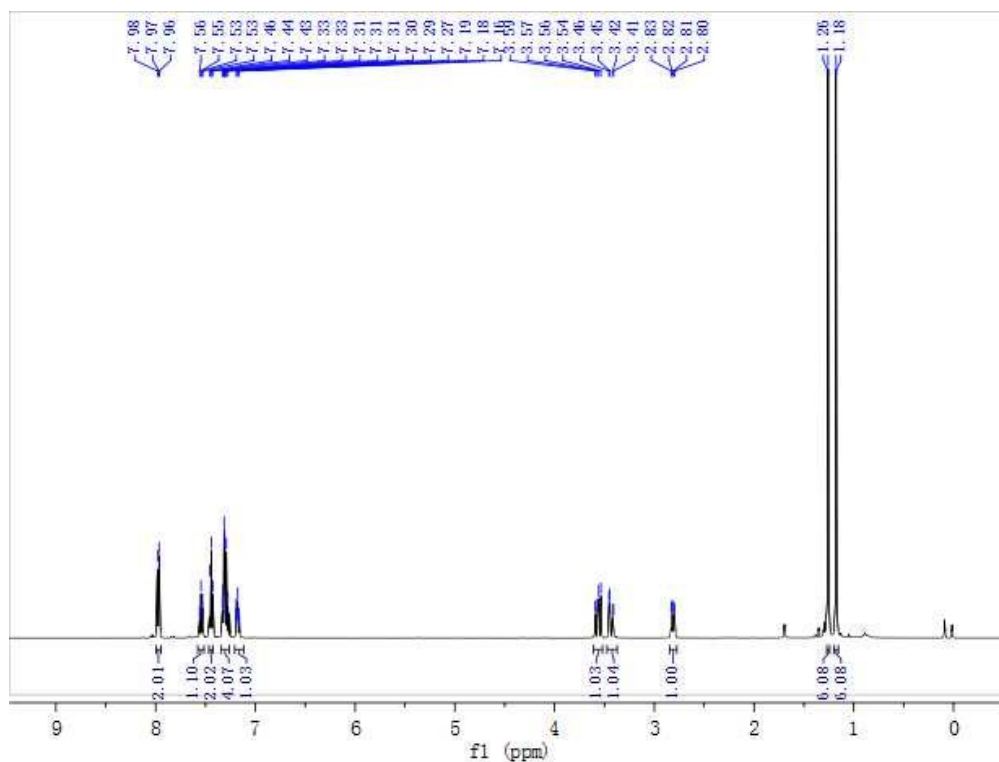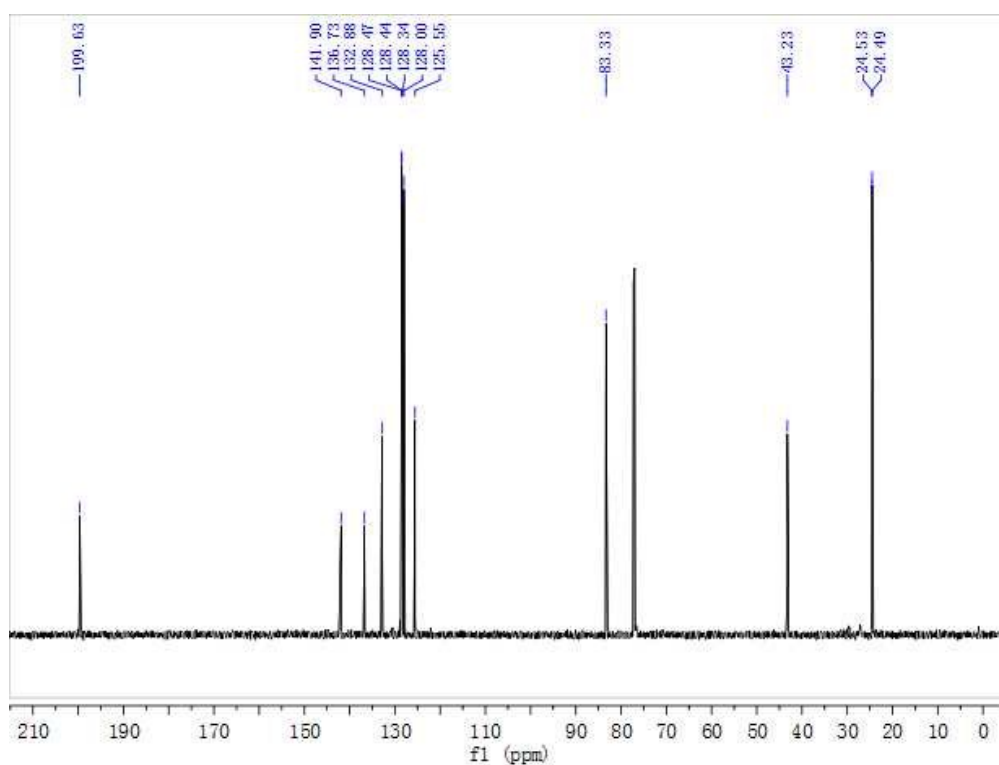

Supplement: c5qo00289c1.pdf [file c5qo00289c1.pdf]
